# Supplementary material for: The conversion of protonated cytosine-SO3− to uracil-SO3−: Insights into the novel induced hydrolytic deamination through bisulfite catalysis
Source: Royal Society of Chemistry journal article supplement (doi:10.1039/c3cp51275d), 2013-01-01
Supplement: c3cp51275d.pdf [file c3cp51275d.pdf]

## Supporting information

-for-

### **The Conversion of Protonated Cytosine-SO<sub>3</sub><sup>-</sup> to Uracil-SO<sub>3</sub><sup>-</sup>: Insights into the Novel Induced Hydrolytic Deamination through Bisulfite Catalysis**

Lingxia Jin,<sup>a,b</sup> Wenliang Wang<sup>\*,a</sup> Daodao Hu<sup>a</sup> Jian Lü<sup>\*,c</sup>

<sup>a</sup>*Key Laboratory for Macromolecular Science of Shaanxi Province, School of Chemistry and Chemical Engineering, Shaanxi Normal University, Xi'an 710062*

<sup>b</sup>*School of Chemical & Environment Science, Shaanxi University of Technology, Hanzhong, Shaanxi 723001*

<sup>c</sup>*Xi'an Modern Chemistry Research Institute, Xi'an 710065, People's Republic of China*

---

\* Corresponding authors. Tel: +86-29-81530815 Fax: +86-29-81530727; e-mail: [wlwang@snnu.edu.cn](mailto:wlwang@snnu.edu.cn) (W. L. Wang), [lujian204@263.net](mailto:lujian204@263.net) (J. Lü).

## Table and Figure from calculation

### Contents:

Table S1 The energy information on the  $\text{SO}_3^{2-}$ -induced hydrolytic deamination

Fig.S1 Optimized stationary structures (bond distances in Å) in the gas phase for the  $\text{SO}_3^{2-}$ -induced hydrolytic deamination of protonated  $\text{Cyt-SO}_3^-$  (path E) are at B3LYP/6-311++G(d,p) level of theory.

Fig.S2 Optimized stationary structures (bond distances in Å) in the aqueous phase for the  $\text{SO}_3^{2-}$ -induced hydrolytic deamination of protonated  $\text{Cyt-SO}_3^-$  (path E) are at B3LYP/6-311++G(d,p) level of theory.

Fig. S3 Optimized stationary structures (bond distances in Å) in the aqueous phase for the direct hydrolytic deamination of protonated  $\text{Cyt-SO}_3^-$  (path A) are at B3LYP/6-311++G(d,p) level of theory.

Fig. S4 Optimized stationary structures (bond distances in Å) in the aqueous phase for the  $\text{HSO}_3^-$ -induced hydrolytic deamination of protonated  $\text{Cyt-SO}_3^-$  (path B—the  $\text{HSO}_3^-$  group toward the left side of protonated  $\text{Cyt-SO}_3^-$ ) are at B3LYP/6-311++G(d,p) level of theory.

Fig. S5 Optimized stationary structures (bond distances in Å) in the aqueous phase for the  $\text{HSO}_3^-$ -induced hydrolytic deamination of protonated  $\text{Cyt-SO}_3^-$  (path C—the  $\text{HSO}_3^-$  group toward the above side of protonated  $\text{Cyt-SO}_3^-$ ) are at B3LYP/6-311++G(d,p) level of theory.

Fig. S6 Optimized stationary structures (bond distances in Å) in the aqueous phase for the  $\text{HSO}_3^-$ -induced hydrolytic deamination of protonated  $\text{Cyt-SO}_3^-$  (path D—the  $\text{HSO}_3^-$  group toward the right side of protonated  $\text{Cyt-SO}_3^-$ ) are at B3LYP/6-311++G(d,p) level of theory.

Section S1 The corresponding structure coordinates of all paths (paths A-E).

**Table S1 Relative Energies <sup>a</sup> (in kcal·mol<sup>-1</sup>) for the SO<sub>3</sub><sup>2-</sup>-induced Reaction (path E)**

| System                                        | MP2//B3LYP method <sup>b</sup> |                        | PCM <sup>c</sup> |                        |
|-----------------------------------------------|--------------------------------|------------------------|------------------|------------------------|
|                                               | $\Delta G^g$                   | $\Delta G^{g\ddagger}$ | $\Delta G^s$     | $\Delta G^{s\ddagger}$ |
| R <sup>d</sup> +SO <sub>3</sub> <sup>2-</sup> | 0.00                           | 0.00                   | 0.00             |                        |
| E-RC                                          | -163.42                        | -144.62                | -28.81           |                        |
| E-TS1                                         | -136.08                        | -113.79                | 2.54             |                        |
| E-IM1                                         | -157.85                        | -137.79                | -24.06           |                        |
| E-TS2                                         | -155.20                        | -135.70                | -11.82           |                        |
| E-IM2                                         | -157.04                        | -137.50                | -16.68           |                        |
| E-TS3                                         | -146.44                        | -124.37                | -4.35            |                        |
| E-IM3                                         | -157.64                        | -137.45                | -16.93           |                        |
| E-TS4                                         | -125.01                        | -103.57                | --               |                        |
| E-P                                           | -167.31                        | -150.01                | -25.08           |                        |
| E-RC→E-IM1                                    |                                | 22.29                  |                  | 31.35                  |
| E-IM1→E-IM2                                   |                                | 2.09                   |                  | 12.24                  |
| E-IM2→E-IM3                                   |                                | 13.13                  |                  | 12.33                  |
| E-IM3→E-P                                     |                                | 33.88                  |                  | --                     |

<sup>a</sup>  $\Delta G^g$ , relative free energy in the gas phase;  $\Delta G^{g\ddagger}$ , activation free energy in the gas phase;  $\Delta G^s$ , relative free energy in the aqueous phase;  $\Delta G^{s\ddagger}$ , activation free energy in the aqueous phase. <sup>b</sup> MP2/6-311++G(3df,3pd)//B3LYP/6-311++G(d,p) level. <sup>c</sup> MP2/6-311++G(3df,3pd)//B3LYP/6-311++G(d,p) with PCM model. <sup>d</sup> denotes protonated Cyt-SO<sub>3</sub><sup>-</sup>+H<sub>2</sub>O.

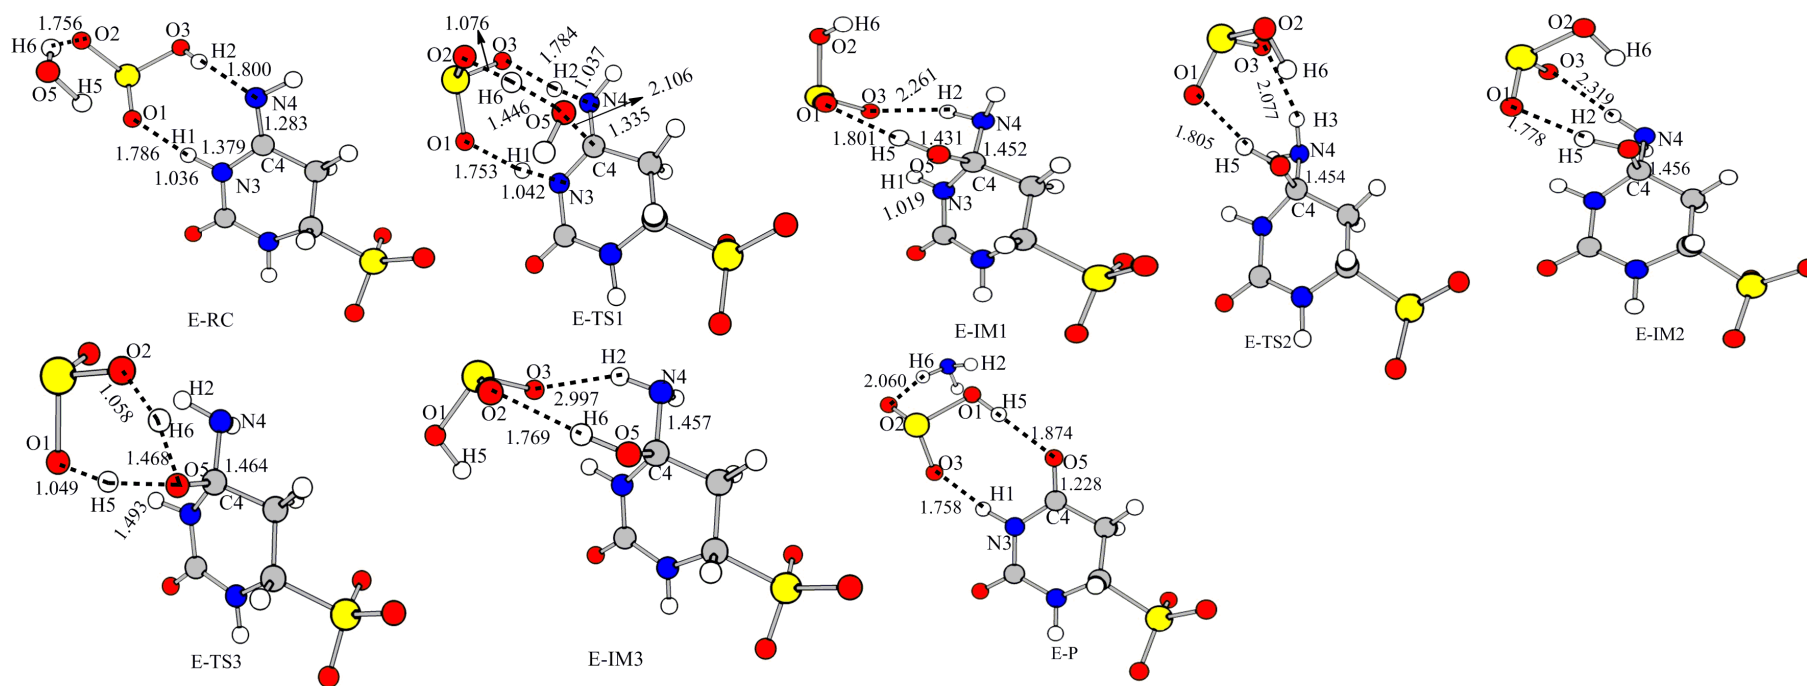

Fig.S1.

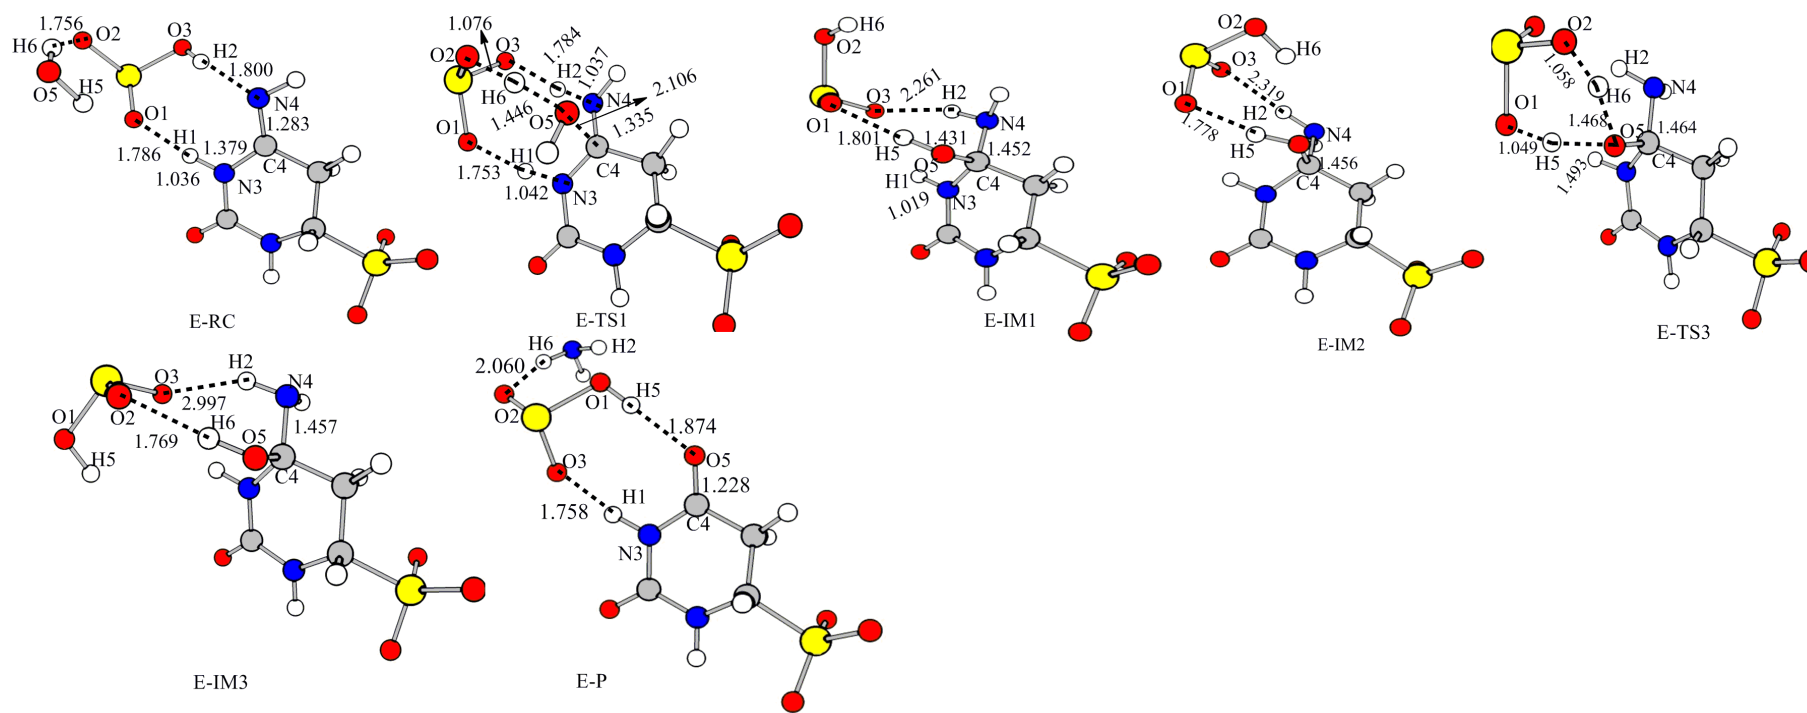

Fig.S2.

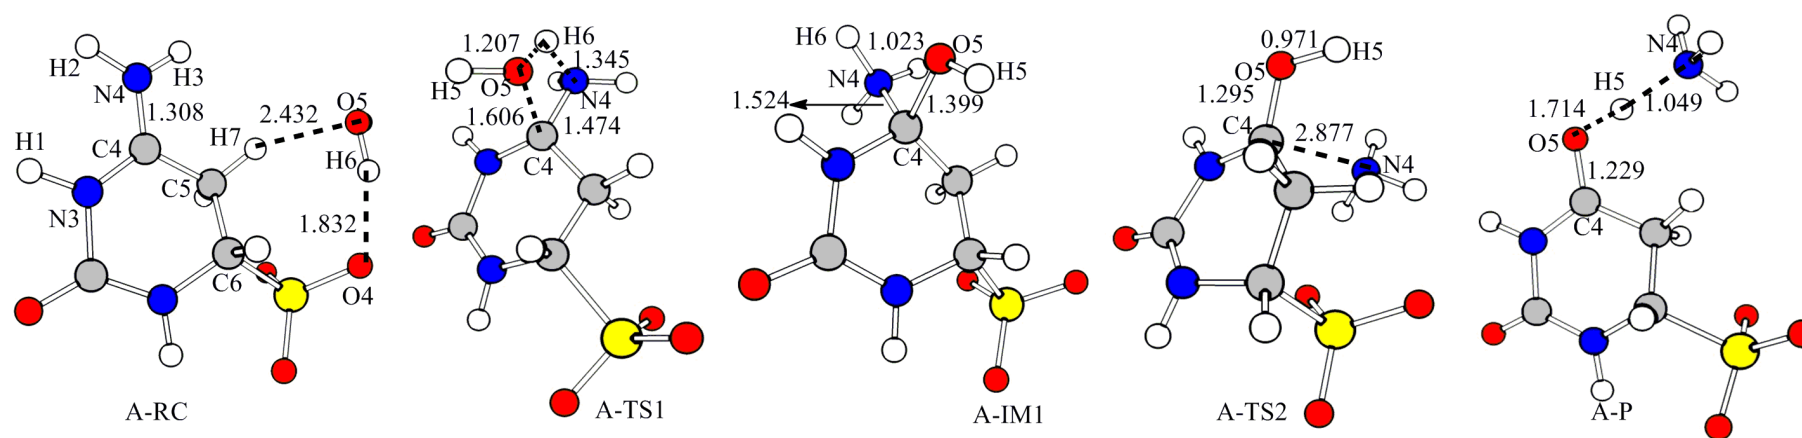

Fig.S3.

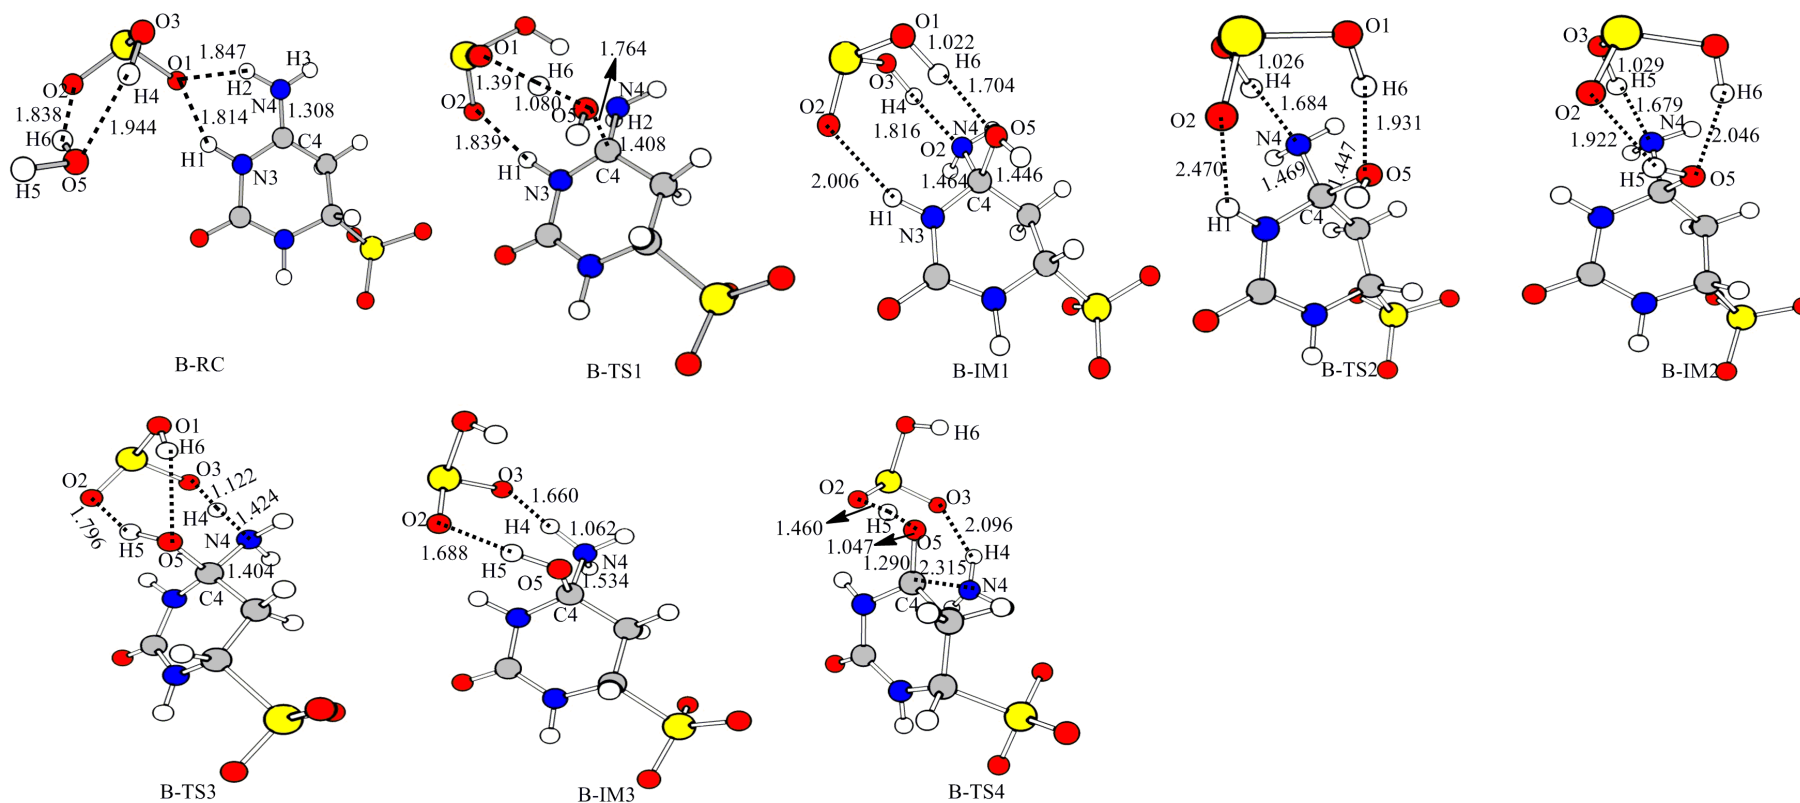

Fig.S4.

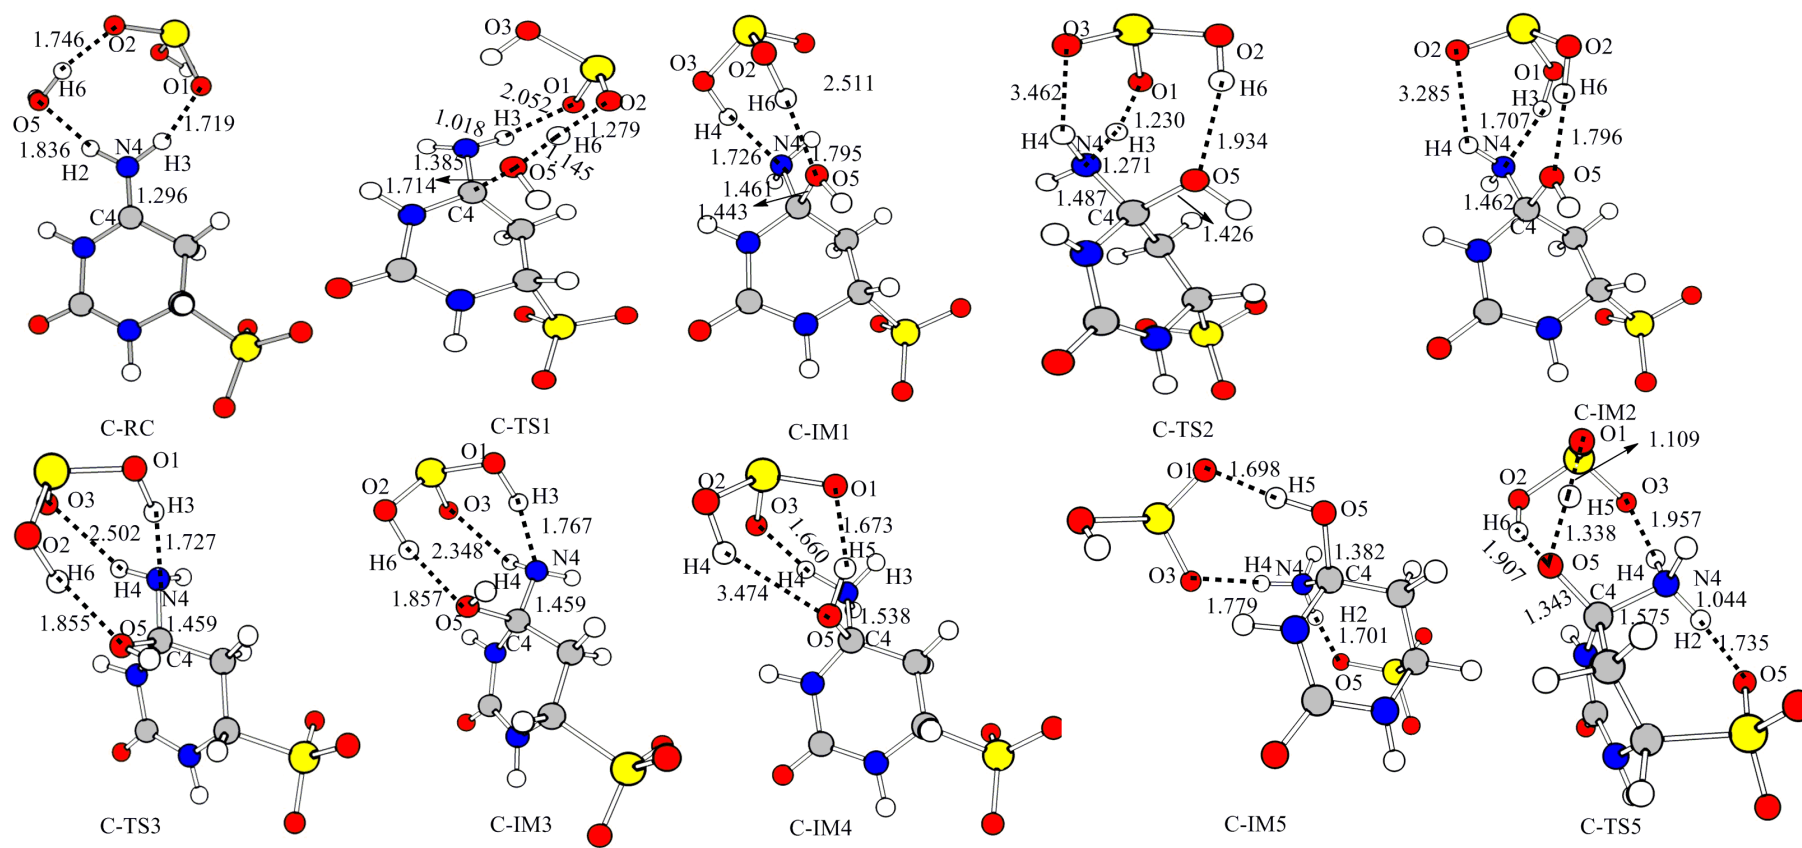

Fig.S5.



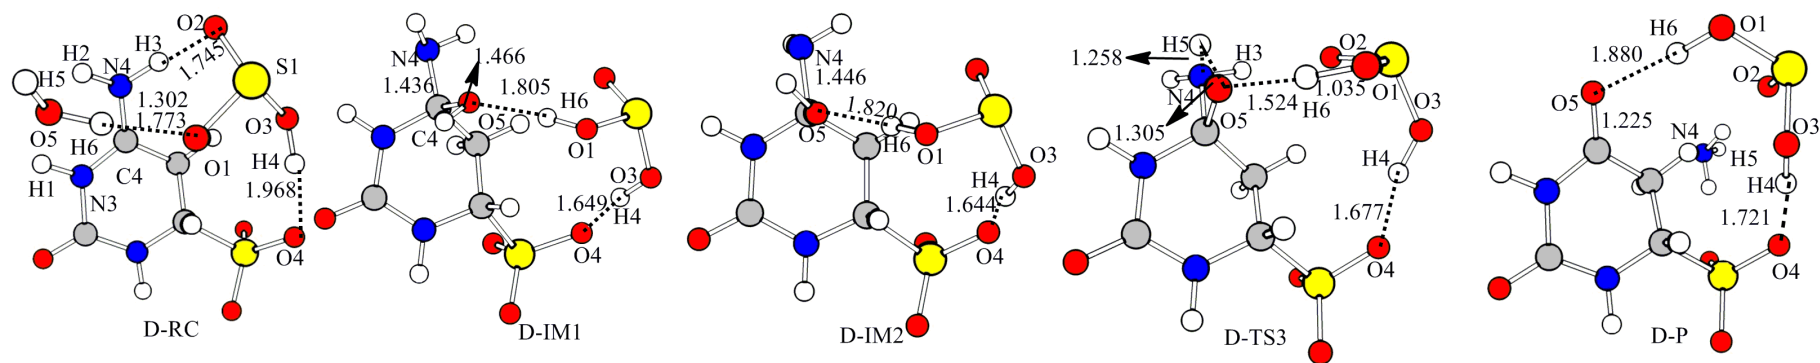

Fig.S6.

Section S1 The corresponding structure coordinates of all paths (paths A-E).

Path A

A-RC

|   |             |             |             |
|---|-------------|-------------|-------------|
| N | 0.82668200  | -1.32289400 | -0.31615900 |
| C | 2.15274700  | -1.20703000 | -0.20208800 |
| O | 3.00859600  | -2.05773000 | -0.19203400 |
| N | 2.60207500  | 0.19011400  | -0.08570900 |
| C | 1.82045100  | 1.22699000  | 0.17880800  |
| N | 2.30586100  | 2.45433800  | 0.29098500  |
| C | 0.37225100  | 0.97505900  | 0.38669400  |
| C | -0.09715900 | -0.20407400 | -0.44918600 |
| H | 3.28776500  | 2.67018800  | 0.19124800  |
| H | -0.23734100 | 0.06419200  | -1.49989900 |
| H | 1.66818900  | 3.22060200  | 0.45411100  |
| H | 0.42457600  | -2.25347400 | -0.40555800 |
| H | -0.22011800 | 1.86801200  | 0.16783100  |
| S | -1.78428600 | -0.76082900 | 0.15222900  |
| O | -1.85581700 | -2.13386700 | -0.38307300 |
| O | -2.68696300 | 0.22554700  | -0.49879600 |
| O | -1.68994500 | -0.63785400 | 1.62065500  |
| H | 0.21879500  | 0.72255500  | 1.44791300  |
| H | 3.61071000  | 0.27331100  | -0.14904900 |
| O | -1.89030100 | 2.86756800  | -0.58892200 |
| H | -2.58701400 | 3.51172300  | -0.43642500 |
| H | -2.33360800 | 1.99026500  | -0.57765400 |

A-TS1

|   |             |             |             |
|---|-------------|-------------|-------------|
| N | 0.07510800  | 1.32863500  | -0.33143900 |
| C | -1.14836600 | 1.75877900  | 0.00105000  |
| O | -1.53942900 | 2.89435200  | 0.15386700  |
| N | -2.11941400 | 0.69156000  | 0.19032300  |
| C | -1.85057700 | -0.64102800 | 0.12068600  |
| N | -2.82272700 | -1.51168700 | 0.85543700  |
| C | -0.40283600 | -1.00140700 | 0.25774400  |
| C | 0.47611800  | -0.05532400 | -0.53846100 |
| H | -3.43445100 | -1.00761100 | 1.49345600  |
| H | 0.49869100  | -0.30516300 | -1.60224000 |
| H | -2.36009200 | -2.27108200 | 1.35300200  |
| H | 0.82358500  | 2.01501100  | -0.39989400 |
| H | -0.22906300 | -2.02968600 | -0.06075300 |
| S | 2.25261800  | -0.24462100 | 0.05859800  |
| O | 2.85159300  | 1.01602100  | -0.43430500 |
| O | 2.67786300  | -1.48684900 | -0.61207300 |
| O | 2.09870700  | -0.33877900 | 1.52970100  |
| H | -0.12307400 | -0.90556700 | 1.31622500  |
| H | -3.05803700 | 1.04745500  | 0.31852900  |
| O | -2.42319700 | -1.34607200 | -1.27452500 |
| H | -2.70559800 | -0.70435000 | -1.94324000 |
| H | -3.15493900 | -1.76014300 | -0.36031900 |

A-IM1

|   |             |             |             |
|---|-------------|-------------|-------------|
| N | -0.16352200 | 1.51072400  | -0.72428000 |
| C | 0.46113600  | 0.27797200  | -1.08842600 |
| C | -0.55649300 | -0.85557700 | -1.20054800 |
| N | -2.02351000 | 0.44206200  | 0.22959000  |
| C | -1.30657700 | 1.62047700  | 0.04680600  |
| O | -1.70232500 | 2.68214500  | 0.48184400  |
| H | 0.38848000  | 2.35704000  | -0.75376500 |
| C | -1.55773700 | -0.89982400 | -0.03596500 |
| N | -0.93449400 | -1.49087800 | 1.15264400  |
| H | 0.50375900  | -0.60867800 | 1.57124400  |
| H | -2.80346200 | 0.54597200  | 0.86533300  |

|   |             |             |             |
|---|-------------|-------------|-------------|
| O | -2.67427800 | -1.72147300 | -0.34766600 |
| H | -3.17035800 | -1.31408000 | -1.06914600 |
| H | -0.69088400 | -2.46123200 | 0.96084800  |
| H | -1.61017500 | -1.50046400 | 1.91402200  |
| S | 1.91128100  | -0.13247100 | 0.03637100  |
| O | 2.27686500  | -1.52315300 | -0.22582200 |
| O | 2.87933000  | 0.94040300  | -0.11781200 |
| O | 1.29471900  | 0.01250700  | 1.51465700  |
| H | -1.12518100 | -0.69212100 | -2.11949100 |
| H | -0.04480500 | -1.81361500 | -1.28950500 |
| H | 0.98636100  | 0.39162200  | -2.03995200 |

A-TS2

|   |             |             |             |
|---|-------------|-------------|-------------|
| N | -0.08479700 | 1.54053100  | -0.22472700 |
| C | -1.34684900 | 1.68303500  | 0.18137600  |
| O | -1.85887200 | 2.56848900  | 0.81958700  |
| N | -2.22353600 | 0.57745300  | -0.23360100 |
| C | -1.82592700 | -0.56201100 | -0.72543600 |
| N | -1.20708000 | -2.00091100 | 1.82691800  |
| C | -0.41087800 | -0.79809000 | -1.08911600 |
| C | 0.51537900  | 0.41466200  | -0.92941600 |
| H | -1.72071000 | -1.57876400 | 2.59623000  |
| H | 0.88795300  | 0.75432300  | -1.89639700 |
| H | -0.25191200 | -1.63174800 | 1.86677500  |
| H | 0.59333900  | 2.19900000  | 0.15450900  |
| H | -0.38472000 | -1.17353800 | -2.11621700 |
| S | 2.04247300  | -0.10715900 | 0.03548900  |
| O | 2.76667500  | -0.94350500 | -0.93555000 |
| O | 1.46422900  | -0.85566700 | 1.18673000  |
| O | 2.63277400  | 1.20215300  | 0.37934800  |
| H | -0.06406700 | -1.60625000 | -0.43124000 |
| H | -3.19011100 | 0.69153700  | 0.05803300  |
| O | -2.75712500 | -1.45476600 | -0.94309500 |
| H | -2.37118800 | -2.32749600 | -1.10916000 |
| H | -1.14206400 | -2.99124200 | 2.04891400  |

A-P

|   |             |             |             |
|---|-------------|-------------|-------------|
| N | 0.64263800  | 1.51466000  | -0.17765700 |
| C | -0.40263300 | 2.32813300  | 0.00726600  |
| O | -0.42789300 | 3.51028200  | 0.24832200  |
| N | -1.69541600 | 1.63718300  | -0.09887900 |
| C | -1.87586700 | 0.32982300  | -0.07883800 |
| N | -3.36523300 | -2.68079600 | 0.09423400  |
| C | -0.67635000 | -0.54365500 | -0.02019100 |
| C | 0.56137500  | 0.12385300  | -0.59528900 |
| H | -4.30836000 | -2.87324500 | 0.42567800  |
| H | 0.60977200  | 0.03903800  | -1.68408600 |
| H | -2.72121500 | -3.11882700 | 0.75078300  |
| H | 1.57968300  | 1.90182300  | -0.09516600 |
| H | -0.85955800 | -1.49136800 | -0.52587300 |
| S | 2.06408600  | -0.79471700 | 0.05428200  |
| O | 3.14185900  | 0.18631300  | -0.19195600 |
| O | 2.06151000  | -2.00983100 | -0.78363100 |
| O | 1.71914500  | -1.01742400 | 1.48004900  |
| H | -0.46702600 | -0.76725400 | 1.04078400  |
| H | -2.49897900 | 2.25512200  | -0.04897900 |
| O | -3.07768100 | -0.12011600 | -0.06789600 |
| H | -3.15184500 | -1.18705200 | -0.01638200 |
| H | -3.25643100 | -3.16281200 | -0.79595200 |

Path B

B-RC

|   |             |            |            |
|---|-------------|------------|------------|
| N | -1.97179300 | 1.19029800 | 0.47598300 |
|---|-------------|------------|------------|

|   |             |             |             |
|---|-------------|-------------|-------------|
| C | -0.74803800 | 1.71958900  | 0.26113000  |
| O | -0.43904800 | 2.88548500  | 0.37894700  |
| N | 0.25284900  | 0.76336900  | -0.13651200 |
| C | -0.01276700 | -0.47769100 | -0.53238900 |
| N | 0.94594500  | -1.30296100 | -0.89682700 |
| C | -1.44344400 | -0.91624200 | -0.59995300 |
| C | -2.27761600 | -0.22680200 | 0.46486400  |
| H | 0.67718500  | -2.23183600 | -1.18201300 |
| H | -2.12925400 | -0.67590700 | 1.45230500  |
| H | 4.12927400  | -1.63845100 | -0.28381500 |
| H | -2.71189000 | 1.81221600  | 0.78242400  |
| H | -1.52273700 | -1.99970200 | -0.50448600 |
| S | -4.09862100 | -0.45645300 | 0.10591100  |
| O | -4.21180800 | -0.25182700 | -1.35846400 |
| O | -4.70984300 | 0.61223400  | 0.93536000  |
| O | -4.34477900 | -1.84320100 | 0.56132900  |
| H | -1.84755300 | -0.63285400 | -1.58114900 |
| H | 1.23481000  | 1.11406100  | -0.19227500 |
| O | 4.92881000  | -2.16017300 | 1.48232500  |
| H | 1.97156700  | -1.09178700 | -0.88096200 |
| H | 5.85955100  | -2.37378800 | 1.59233900  |
| S | 4.22286700  | 0.67257400  | -0.48983300 |
| O | 4.69773900  | 0.48136900  | 0.92609800  |
| O | 3.66969000  | -1.03115300 | -0.89460800 |
| O | 2.88083000  | 1.34380400  | -0.56430800 |
| H | 4.88056900  | -1.18026100 | 1.54655000  |

#### B-TS1

|   |             |             |             |
|---|-------------|-------------|-------------|
| N | 1.57915800  | 1.28673100  | -0.36015400 |
| C | 0.44679100  | 1.86139200  | 0.12242100  |
| O | 0.25836700  | 3.06424800  | 0.20080900  |
| N | -0.55335800 | 0.96295400  | 0.54553200  |
| C | -0.46638200 | -0.41558200 | 0.44333600  |
| N | -1.38058500 | -1.13145300 | 1.21359400  |
| C | 0.95316900  | -0.93477800 | 0.45152200  |
| C | 1.86046300  | -0.13374300 | -0.46482500 |
| H | -0.96823500 | -1.85994500 | 1.77690500  |
| H | 1.79440100  | -0.47254800 | -1.50453900 |
| H | -3.61284600 | -1.87873000 | 0.40993400  |
| H | 2.34817400  | 1.90834200  | -0.58397100 |
| H | 0.96910300  | -1.98732800 | 0.17156500  |
| S | 3.65998400  | -0.43596200 | -0.03647100 |
| O | 3.71479900  | -0.36616500 | 1.44383600  |
| O | 4.32939600  | 0.68970700  | -0.73918600 |
| O | 3.91057800  | -1.78014900 | -0.60675500 |
| H | 1.33047500  | -0.83403400 | 1.47551500  |
| H | -1.46950900 | 1.36976600  | 0.72086600  |
| O | -0.99377200 | -0.82105700 | -1.16776700 |
| H | -2.07661500 | -0.56019600 | 1.68206800  |
| H | -0.45945600 | -0.33508200 | -1.81109500 |
| S | -4.25836500 | 0.12508200  | -0.25535600 |
| O | -3.28022600 | -0.07630000 | -1.45350700 |
| O | -4.49096500 | -1.48763700 | 0.26156100  |
| O | -3.50528100 | 0.77660000  | 0.87503700  |
| H | -2.10531600 | -0.46147600 | -1.28777000 |

#### B-IM1

|   |             |             |             |
|---|-------------|-------------|-------------|
| N | 1.61148200  | 1.34992700  | -0.19425100 |
| C | 0.39405800  | 1.85123100  | 0.15786600  |
| O | 0.14585500  | 3.04641200  | 0.22493500  |
| N | -0.59259900 | 0.90236100  | 0.46480200  |
| C | -0.44781800 | -0.51072900 | 0.32363700  |
| N | -1.31534100 | -1.16755700 | 1.31590500  |
| C | 1.02453100  | -0.90588300 | 0.45376800  |

|   |             |             |             |
|---|-------------|-------------|-------------|
| C | 1.90600400  | -0.04522000 | -0.43004100 |
| H | -1.11587200 | -2.16561600 | 1.31419100  |
| H | 1.80745500  | -0.30674900 | -1.49390800 |
| H | -3.06617500 | -1.08293900 | 1.11830900  |
| H | 2.34621800  | 2.01608700  | -0.39631700 |
| H | 1.14476300  | -1.95962400 | 0.19625800  |
| S | 3.71568100  | -0.37944400 | -0.09238900 |
| O | 3.82757900  | -0.43611900 | 1.38513300  |
| O | 4.37194400  | 0.79494600  | -0.72327700 |
| O | 3.93577100  | -1.67411100 | -0.78192000 |
| H | 1.34557700  | -0.76174500 | 1.48877700  |
| H | -1.54126500 | 1.27195200  | 0.45111300  |
| O | -0.98866800 | -1.01131000 | -0.93718700 |
| H | -1.07242800 | -0.80437600 | 2.23365300  |
| H | -0.35220400 | -0.81121200 | -1.63491800 |
| S | -4.41263900 | 0.01296900  | -0.23023800 |
| O | -3.70785400 | -0.71553000 | -1.53748800 |
| O | -4.06106100 | -1.07319600 | 0.94685500  |
| O | -3.62345400 | 1.23476800  | 0.06685100  |
| H | -2.73107400 | -0.78857500 | -1.40292800 |

B-TS2

|   |             |             |             |
|---|-------------|-------------|-------------|
| N | 1.71698700  | 1.35311500  | -0.25521900 |
| C | 0.55604500  | 1.95769600  | 0.09757000  |
| O | 0.38993600  | 3.16863400  | 0.14877700  |
| N | -0.50479900 | 1.09199100  | 0.42441800  |
| C | -0.47532900 | -0.33126500 | 0.35109300  |
| N | -1.34087000 | -0.86946300 | 1.42586600  |
| C | 0.96098800  | -0.84439200 | 0.45060100  |
| C | 1.90026300  | -0.07217300 | -0.45470000 |
| H | -0.95105800 | -0.57372900 | 2.31801000  |
| H | 1.76947600  | -0.34974500 | -1.50584200 |
| H | -3.03369600 | -0.51340200 | 1.37209000  |
| H | 2.50944000  | 1.94844000  | -0.46337400 |
| H | 0.97921200  | -1.90318300 | 0.18818300  |
| S | 3.68084100  | -0.51083300 | -0.09205600 |
| O | 3.78073600  | -0.52780400 | 1.38869800  |
| O | 4.41447600  | 0.60380200  | -0.74886000 |
| O | 3.83310100  | -1.83631600 | -0.73819200 |
| H | 1.31607300  | -0.73183600 | 1.47901200  |
| H | -1.41341800 | 1.54087500  | 0.43657800  |
| O | -1.08100300 | -0.82178400 | -0.88077400 |
| H | -1.21058600 | -0.05087700 | -1.44711700 |
| S | -4.42210300 | -0.08621400 | -0.28502100 |
| O | -3.82570200 | -1.44929700 | -1.02990800 |
| O | -4.03769600 | -0.40617300 | 1.27001200  |
| O | -3.56479600 | 1.04289000  | -0.72929800 |
| H | -2.83986100 | -1.40729300 | -1.02445500 |
| H | -1.28883900 | -1.88680200 | 1.40367800  |

B-IM2

|   |             |             |             |
|---|-------------|-------------|-------------|
| N | 1.82959300  | 1.33170100  | -0.40450600 |
| C | 0.78686400  | 2.10417300  | -0.01918800 |
| O | 0.76722600  | 3.32793000  | -0.06764100 |
| N | -0.32680800 | 1.40968000  | 0.48517200  |
| C | -0.49419000 | -0.01039800 | 0.46167400  |
| N | -1.38727000 | -0.36103300 | 1.59921400  |
| C | 0.86704000  | -0.69446200 | 0.55108300  |
| C | 1.84848300  | -0.11888100 | -0.45254700 |
| H | -1.00091600 | 0.04724000  | 2.44756700  |
| H | 1.64450900  | -0.48188600 | -1.46364800 |
| H | -3.06287700 | -0.09950800 | 1.37988600  |
| H | 2.66614200  | 1.80564500  | -0.72238400 |
| H | 0.74657900  | -1.76411300 | 0.37144600  |
| S | 3.58298500  | -0.71104600 | -0.09054400 |

|   |             |             |             |
|---|-------------|-------------|-------------|
| O | 3.74807100  | -0.55528000 | 1.37673700  |
| O | 4.40586800  | 0.22125400  | -0.90699900 |
| O | 3.55996900  | -2.11621200 | -0.56403800 |
| H | 1.27703900  | -0.55070100 | 1.55453300  |
| H | -1.15086100 | 1.98871700  | 0.57253500  |
| O | -1.14855500 | -0.47888500 | -0.73020100 |
| H | -1.73943300 | 0.22583200  | -1.05388700 |
| S | -4.42867100 | -0.31421100 | -0.36066500 |
| O | -3.67557000 | -1.76981400 | -0.66083900 |
| O | -4.06903400 | -0.09862000 | 1.21120100  |
| O | -3.66731600 | 0.70361300  | -1.13897800 |
| H | -2.70699800 | -1.61196600 | -0.74976200 |
| H | -1.36527700 | -1.37206100 | 1.72383800  |

B-TS3

|   |             |             |             |
|---|-------------|-------------|-------------|
| N | 1.78909500  | 1.35062600  | -0.31392900 |
| C | 0.67289400  | 2.02959000  | 0.04204900  |
| O | 0.57140000  | 3.24881000  | 0.04994000  |
| N | -0.41931600 | 1.23827000  | 0.45342500  |
| C | -0.48420800 | -0.18730800 | 0.32082900  |
| N | -1.35157600 | -0.67735500 | 1.46460500  |
| C | 0.91002800  | -0.79452000 | 0.42582300  |
| C | 1.89521400  | -0.08614500 | -0.48317700 |
| H | -1.30124600 | -1.69503800 | 1.49268800  |
| H | 1.75552100  | -0.37431200 | -1.52889300 |
| H | -2.62130800 | -0.35950400 | 1.33645400  |
| H | 2.60317400  | 1.89786400  | -0.56519400 |
| H | 0.86058800  | -1.85141000 | 0.15913400  |
| S | 3.64179100  | -0.61759600 | -0.08456500 |
| O | 3.72676600  | -0.58010900 | 1.39749600  |
| O | 4.44969200  | 0.42053000  | -0.77733500 |
| O | 3.71555200  | -1.97672600 | -0.67249200 |
| H | 1.27457600  | -0.70578800 | 1.45327900  |
| H | -1.29340100 | 1.74859000  | 0.42291900  |
| O | -1.10072400 | -0.63722100 | -0.86566400 |
| H | -0.97261700 | -0.32163300 | 2.34073700  |
| H | -1.79862500 | 0.00416100  | -1.12004800 |
| S | -4.41347500 | -0.06612000 | -0.19976900 |
| O | -4.21686000 | -1.66860600 | -0.73312700 |
| O | -3.78597400 | -0.12350200 | 1.24091600  |
| O | -3.47957300 | 0.72108600  | -1.07584900 |
| H | -3.29293500 | -1.78808700 | -1.01466000 |

B-IM3

|   |             |             |             |
|---|-------------|-------------|-------------|
| N | 1.79106500  | 1.36423200  | -0.15347900 |
| C | 0.58857200  | 1.91941800  | 0.13360100  |
| O | 0.38601600  | 3.11877400  | 0.24591600  |
| N | -0.47517500 | 1.01168000  | 0.33821000  |
| C | -0.39435900 | -0.39618700 | 0.10922100  |
| N | -1.19894900 | -1.05432100 | 1.28604200  |
| C | 1.03486100  | -0.91090100 | 0.21982900  |
| C | 2.01048200  | -0.02013500 | -0.52244700 |
| H | -1.07968100 | -2.06606700 | 1.23859800  |
| H | 1.95062900  | -0.16451400 | -1.60523600 |
| H | -2.26182700 | -0.83948300 | 1.22768500  |
| H | 2.57538900  | 1.99382100  | -0.27213000 |
| H | 1.07648300  | -1.92431700 | -0.18186600 |
| S | 3.76491900  | -0.49308600 | -0.07982800 |
| O | 3.74537100  | -0.67860100 | 1.39394900  |
| O | 4.53397500  | 0.68955800  | -0.54586800 |
| O | 3.97817500  | -1.73817400 | -0.85463200 |
| H | 1.35004200  | -0.93150500 | 1.26788400  |
| H | -1.38233100 | 1.43282200  | 0.16078500  |
| O | -0.99699000 | -0.84724400 | -1.05104900 |
| H | -0.83496000 | -0.71486300 | 2.17577100  |

|   |             |             |             |
|---|-------------|-------------|-------------|
| H | -1.83337400 | -0.33313400 | -1.18128700 |
| S | -4.40139500 | 0.21435300  | 0.03953400  |
| O | -5.23486600 | -0.97670800 | -0.85945800 |
| O | -3.78294500 | -0.58430800 | 1.19440600  |
| O | -3.26054800 | 0.61573800  | -0.88520800 |
| H | -4.57817300 | -1.58962100 | -1.22658600 |

B-TS4

|   |             |             |             |
|---|-------------|-------------|-------------|
| N | -1.85850400 | 1.52273300  | -0.00922900 |
| C | -0.62985900 | 2.07451500  | -0.12025700 |
| O | -0.36236800 | 3.07153900  | -0.76964100 |
| N | 0.39204400  | 1.39977200  | 0.59194500  |
| C | 0.27659300  | 0.09314300  | 0.97172700  |
| N | 0.29533800  | -0.84133300 | -1.00971200 |
| C | -1.07973600 | -0.37422200 | 1.41582600  |
| C | -2.26121300 | 0.38060100  | 0.79313200  |
| H | -0.54558400 | -1.40469900 | -1.16469800 |
| H | -2.94211400 | 0.71496500  | 1.57928600  |
| H | 1.16360300  | -1.37411100 | -1.05472900 |
| H | -2.58708100 | 1.92201000  | -0.58924500 |
| H | -1.07837000 | -0.22937600 | 2.50119600  |
| S | -3.37421300 | -0.72961700 | -0.22460800 |
| O | -4.23902700 | 0.25919700  | -0.91601900 |
| O | -4.03605300 | -1.55609600 | 0.80884000  |
| O | -2.47858800 | -1.49975900 | -1.13473700 |
| H | -1.16346800 | -1.44600200 | 1.24238600  |
| H | 1.33344800  | 1.73382800  | 0.39545900  |
| O | 1.29082100  | -0.49713200 | 1.50510700  |
| H | 0.33379900  | -0.14668700 | -1.75051700 |
| H | 2.21087300  | -0.07306200 | 1.14989000  |
| S | 4.14965500  | -0.03636400 | -0.53316800 |
| O | 5.26542000  | -0.95311700 | 0.40190100  |
| O | 3.34853400  | -1.10048500 | -1.22754000 |
| O | 3.26292200  | 0.61769200  | 0.56096800  |
| H | 4.81766300  | -1.78830600 | 0.61074900  |

B-P

|   |             |             |             |
|---|-------------|-------------|-------------|
| N | 2.20718400  | 1.36426600  | -0.10380600 |
| C | 1.29755800  | 2.34102400  | 0.04667900  |
| O | 1.46909300  | 3.41596700  | 0.59518900  |
| N | 0.02642500  | 2.05575300  | -0.53230700 |
| C | -0.43289800 | 0.83356700  | -0.89481800 |
| N | -0.38453400 | 0.06151200  | 2.21444900  |
| C | 0.55903400  | -0.29301900 | -0.92524700 |
| C | 2.02374100  | 0.12626000  | -0.84158400 |
| H | 0.42155000  | -0.56316500 | 2.18505400  |
| H | 2.47472900  | 0.20761400  | -1.83501300 |
| H | -1.23616200 | -0.49164300 | 2.14661000  |
| H | 3.11771400  | 1.49463700  | 0.32320600  |
| H | 0.38083200  | -0.88965300 | -1.82040000 |
| S | 3.03590500  | -1.19434100 | 0.01641600  |
| O | 4.29823600  | -0.46782000 | 0.31602700  |
| O | 3.13905100  | -2.26037600 | -1.00395500 |
| O | 2.23738500  | -1.55669200 | 1.21752700  |
| H | 0.31451000  | -0.92146800 | -0.06310300 |
| H | -0.65968600 | 2.78305300  | -0.37766300 |
| O | -1.62762000 | 0.66788900  | -1.18243300 |
| H | -0.38653500 | 0.51773300  | 3.12085300  |
| H | -3.27619700 | 1.11609100  | -0.39761300 |
| S | -4.26025000 | -0.76222200 | 0.17497000  |
| O | -3.49942500 | -1.32798100 | -1.18049300 |
| O | -3.38974000 | -1.03065200 | 1.33609500  |
| O | -4.19438000 | 0.86901500  | -0.14699800 |
| H | -2.65017300 | -0.84068300 | -1.31031900 |

Path C

C-RC

|   |             |             |             |
|---|-------------|-------------|-------------|
| N | 2.65887500  | 1.28557200  | -0.14029200 |
| C | 1.83004100  | 2.32064400  | 0.06231900  |
| O | 2.12828800  | 3.48021900  | 0.27810200  |
| N | 0.43920600  | 1.97369200  | -0.00439100 |
| C | -0.07073900 | 0.72319700  | -0.01116400 |
| N | -1.35293300 | 0.53439700  | -0.04862100 |
| C | 0.90527000  | -0.40821800 | 0.08154600  |
| C | 2.24763200  | -0.05180600 | -0.54011200 |
| H | -2.02515800 | 1.32214100  | -0.05284800 |
| H | 2.22979300  | -0.14488800 | -1.63009100 |
| H | -1.81198600 | -0.40846200 | -0.08636700 |
| H | 3.66084400  | 1.44739000  | -0.09906500 |
| H | 0.48705700  | -1.30573000 | -0.37360800 |
| S | 3.58145200  | -1.24213000 | 0.02551800  |
| O | 4.81185200  | -0.46126000 | -0.27080700 |
| O | 3.35761200  | -2.42867200 | -0.82523900 |
| O | 3.30400700  | -1.43499400 | 1.46861300  |
| H | 1.07113700  | -0.62377400 | 1.14620800  |
| H | -0.18019800 | 2.77420000  | 0.02677800  |
| O | -3.51067000 | 2.31577500  | -0.15346000 |
| H | -4.28760200 | -1.46720400 | 1.96241000  |
| H | -3.95028800 | 2.55911100  | 0.66732000  |
| S | -4.45708300 | -1.28565100 | -0.26020800 |
| O | -4.70788300 | 0.05196900  | -0.90959300 |
| O | -2.97210300 | -1.61156700 | -0.19895600 |
| O | -4.76581400 | -0.82445600 | 1.42118200  |
| H | -4.03507300 | 1.53707400  | -0.48685100 |

C-TS1

|   |             |             |             |
|---|-------------|-------------|-------------|
| N | 2.23840100  | 1.16167700  | -0.47404100 |
| C | 1.64729300  | 2.31895400  | -0.11025600 |
| O | 2.15234200  | 3.42891800  | -0.17412700 |
| N | 0.32421600  | 2.19169700  | 0.37763100  |
| C | -0.40477200 | 1.02315000  | 0.43190800  |
| N | -1.53521600 | 1.12263200  | 1.22896700  |
| C | 0.46580900  | -0.21622700 | 0.51562900  |
| C | 1.64543400  | -0.16529000 | -0.44183400 |
| H | -1.43715400 | 1.74888800  | 2.01321400  |
| H | 1.37592300  | -0.49312500 | -1.45294000 |
| H | -2.03093600 | 0.24720100  | 1.42578600  |
| H | 3.21709600  | 1.19864500  | -0.73991700 |
| H | -0.13219700 | -1.11214400 | 0.35426600  |
| S | 2.98397900  | -1.38386500 | 0.05474400  |
| O | 4.14344500  | -0.87444800 | -0.72670600 |
| O | 2.43822100  | -2.68276300 | -0.39501900 |
| O | 3.11079500  | -1.22429000 | 1.52254400  |
| H | 0.85599000  | -0.25264800 | 1.53912100  |
| H | -0.17472300 | 3.06968100  | 0.41341200  |
| O | -1.16369700 | 0.86926300  | -1.15919400 |
| H | -4.48160700 | 1.03710400  | 0.26187500  |
| H | -0.52425500 | 0.52836100  | -1.79984300 |
| S | -4.02012200 | -1.08593300 | -0.18033200 |
| O | -3.06225500 | -0.62724000 | -1.31477400 |
| O | -3.24811600 | -1.14109100 | 1.10851500  |
| O | -5.03743800 | 0.28672900  | -0.00223300 |
| H | -2.07060800 | 0.16860900  | -1.17818700 |

C-IM1

|   |            |            |             |
|---|------------|------------|-------------|
| N | 2.03904200 | 1.32700600 | -0.37583800 |
| C | 1.03963500 | 2.18131500 | -0.03353500 |
| O | 1.13650800 | 3.40140300 | -0.05510600 |



|   |             |             |             |
|---|-------------|-------------|-------------|
| N | -0.15852900 | 1.57649100  | 0.37259000  |
| C | -0.45325600 | 0.17879800  | 0.28241900  |
| N | -1.50621800 | -0.11720100 | 1.25508600  |
| C | 0.84114600  | -0.61580900 | 0.47726300  |
| C | 1.93771400  | -0.11637200 | -0.44731900 |
| H | -1.14594500 | 0.04436500  | 2.19116400  |
| H | 1.78975500  | -0.45309500 | -1.48315700 |
| H | -1.78418400 | -1.09590700 | 1.18010800  |
| H | 2.93722700  | 1.73100800  | -0.61236700 |
| H | 0.65329300  | -1.67544000 | 0.29961200  |
| S | 3.59182400  | -0.87463100 | -0.00276500 |
| O | 4.53723100  | 0.01380200  | -0.72895400 |
| O | 3.47390400  | -2.24978400 | -0.54230200 |
| O | 3.66865400  | -0.78734800 | 1.47495400  |
| H | 1.18491300  | -0.49052100 | 1.50762800  |
| H | -0.94166900 | 2.21486900  | 0.39156300  |
| O | -1.08134200 | -0.18346000 | -0.97845800 |
| H | -3.13349600 | 0.57563200  | 1.01901200  |
| H | -0.40107700 | -0.23341400 | -1.66049400 |
| S | -4.64567400 | -0.48705000 | -0.15038100 |
| O | -3.82702200 | -0.20332700 | -1.55863400 |
| O | -4.09793800 | -1.73335900 | 0.44039700  |
| O | -4.09216800 | 0.75834400  | 0.77250700  |
| H | -2.85132900 | -0.23242700 | -1.41378700 |

C-TS2

|   |             |             |             |
|---|-------------|-------------|-------------|
| N | -2.18552700 | 1.31464000  | 0.33121900  |
| C | -1.30431300 | 2.29963300  | 0.03429300  |
| O | -1.57054400 | 3.49226300  | 0.00644500  |
| N | 0.00466200  | 1.86915300  | -0.26651100 |
| C | 0.48829600  | 0.53024500  | -0.09802800 |
| N | 1.58681200  | 0.29048000  | -1.07074800 |
| C | -0.64926000 | -0.46143100 | -0.33449200 |
| C | -1.87040400 | -0.09193500 | 0.48792900  |
| H | 1.22750000  | 0.36209300  | -2.02020200 |
| H | -1.75071200 | -0.35716300 | 1.54652800  |
| H | 2.21045600  | -0.69093200 | -0.90771900 |
| H | -3.15311000 | 1.57772600  | 0.47994200  |
| H | -0.31102100 | -1.46690600 | -0.08284300 |
| S | -3.36075600 | -1.10133400 | -0.03978600 |
| O | -4.47416100 | -0.31822300 | 0.55721600  |
| O | -3.10399100 | -2.41840300 | 0.58389000  |
| O | -3.31578300 | -1.08690400 | -1.52123100 |
| H | -0.93934600 | -0.44348600 | -1.38950700 |
| H | 0.67926400  | 2.61798500  | -0.17741700 |
| O | 1.14946500  | 0.33246900  | 1.15646900  |
| H | 2.36948300  | 0.96097400  | -0.94932600 |
| H | 0.48101200  | 0.31897800  | 1.85163900  |
| S | 4.46191000  | -0.69949200 | -0.10342400 |
| O | 4.09299900  | -0.67599100 | 1.55477000  |
| O | 3.27030900  | -1.52219000 | -0.68602800 |
| O | 4.27181400  | 0.73519600  | -0.55226200 |
| H | 3.17959400  | -0.35077700 | 1.65018100  |

C-IM2

|   |             |             |             |
|---|-------------|-------------|-------------|
| N | 2.18883500  | 1.29305200  | -0.38985200 |
| C | 1.34781800  | 2.29939900  | -0.04412900 |
| O | 1.64945600  | 3.48678700  | -0.03408500 |
| N | 0.05296600  | 1.89972600  | 0.31647800  |
| C | -0.47615800 | 0.56349700  | 0.23190500  |
| N | -1.53989300 | 0.32850700  | 1.20145500  |
| C | 0.66344600  | -0.43538500 | 0.42983700  |
| C | 1.84752300  | -0.11568400 | -0.46498900 |
| H | 1.66809400  | -0.42376600 | -1.50245500 |
| H | -1.15704600 | 0.41176200  | 2.13842800  |

|   |             |             |             |
|---|-------------|-------------|-------------|
| H | 3.15340900  | 1.53348700  | -0.58647000 |
| H | 0.29811100  | -1.44083700 | 0.22379400  |
| S | 3.35149700  | -1.12180400 | 0.02110800  |
| O | 3.40015700  | -1.04745800 | 1.50124900  |
| O | 4.44167600  | -0.38435400 | -0.67267800 |
| O | 3.04694700  | -2.46300200 | -0.52862500 |
| H | 1.00181800  | -0.39234300 | 1.46936500  |
| H | -0.60006300 | 2.66898600  | 0.36632200  |
| O | -1.15143700 | 0.35847600  | -1.04079300 |
| S | -4.52573200 | -0.66473700 | -0.10535000 |
| O | -3.51657600 | -1.58411400 | 0.80801900  |
| O | -4.46854300 | 0.71579200  | 0.44488500  |
| O | -3.71041300 | -0.65309200 | -1.54105800 |
| H | -0.53991700 | 0.58757700  | -1.74968900 |
| H | -2.28508200 | 1.02034800  | 1.09711200  |
| H | -2.68538700 | -1.05718200 | 1.01102500  |
| H | -2.80543900 | -0.27560400 | -1.42719000 |

#### C-TS3

|   |             |             |             |
|---|-------------|-------------|-------------|
| N | 2.05841500  | 1.34294200  | -0.36907100 |
| C | 1.10801700  | 2.25048100  | -0.02719500 |
| O | 1.26429900  | 3.46416200  | -0.06990900 |
| N | -0.10284000 | 1.711171000 | 0.43518500  |
| C | -0.47862000 | 0.33297300  | 0.30680600  |
| N | -1.50639700 | -0.03462700 | 1.28480200  |
| C | 0.76262700  | -0.53902600 | 0.47785100  |
| C | 1.87881200  | -0.09127900 | -0.44886000 |
| H | 1.70353400  | -0.40745800 | -1.48419200 |
| H | -1.08815400 | -0.06283200 | 2.21092900  |
| H | 2.96363300  | 1.70230000  | -0.64548500 |
| H | 0.51467700  | -1.58629000 | 0.29288100  |
| S | 3.48013600  | -0.95122500 | -0.01142600 |
| O | 3.57570100  | -0.86546800 | 1.46597000  |
| O | 4.47933100  | -0.13533300 | -0.74957100 |
| O | 3.26256700  | -2.31925900 | -0.54197100 |
| H | 1.11960400  | -0.45504100 | 1.50803100  |
| H | -0.84444900 | 2.39844900  | 0.45069700  |
| O | -1.07958400 | 0.12174700  | -1.00658800 |
| S | -4.54001900 | -0.57635800 | -0.14769700 |
| O | -3.55279900 | -1.72010200 | 0.49949900  |
| O | -4.38208800 | 0.64717800  | 0.68381700  |
| O | -3.77798500 | -0.28335400 | -1.58264700 |
| H | -0.69277000 | -0.67123300 | -1.39736500 |
| H | -2.24991800 | 0.66744300  | 1.30827300  |
| H | -2.70753900 | -1.28507700 | 0.83270700  |
| H | -2.84525700 | 0.00542500  | -1.42733000 |

#### C-IM3

|   |             |             |             |
|---|-------------|-------------|-------------|
| N | 2.00169100  | 1.35551900  | -0.35338000 |
| C | 1.00911300  | 2.21393600  | -0.00751400 |
| O | 1.10428300  | 3.43411400  | -0.04481700 |
| N | -0.17346800 | 1.61514700  | 0.45668300  |
| C | -0.47977500 | 0.22214900  | 0.32932700  |
| N | -1.48336500 | -0.20313100 | 1.31162000  |
| C | 0.80255600  | -0.59114400 | 0.48509600  |
| C | 1.88798700  | -0.08538600 | -0.44706800 |
| H | 1.71255400  | -0.39839400 | -1.48196200 |
| H | -1.03996200 | -0.30586000 | 2.22046000  |
| H | 2.88520200  | 1.76003700  | -0.63715200 |
| H | 0.60559600  | -1.64825400 | 0.29250600  |
| S | 3.52881700  | -0.87403900 | -0.02876600 |
| O | 3.63476200  | -0.79303000 | 1.44862300  |
| O | 4.48571000  | -0.01159600 | -0.77019500 |
| O | 3.36780700  | -2.24837200 | -0.56422700 |

|   |             |             |             |
|---|-------------|-------------|-------------|
| H | 1.16324700  | -0.49844500 | 1.51342900  |
| H | -0.94648200 | 2.26585500  | 0.48625200  |
| O | -1.06690800 | 0.00102800  | -0.98905400 |
| S | -4.53774900 | -0.52036300 | -0.16286000 |
| O | -3.58925400 | -1.74776800 | 0.38821900  |
| O | -4.32182300 | 0.63043100  | 0.75464600  |
| O | -3.78159600 | -0.15385200 | -1.58272000 |
| H | -0.84787800 | -0.89710100 | -1.26939200 |
| H | -2.21505300 | 0.50479200  | 1.40770600  |
| H | -2.73717200 | -1.37140800 | 0.76991800  |
| H | -2.83427300 | 0.08150700  | -1.42302800 |

#### C-TS4

|   |             |             |             |
|---|-------------|-------------|-------------|
| N | 2.11994000  | 1.33902300  | -0.34299500 |
| C | 1.19758000  | 2.28283400  | -0.04377300 |
| O | 1.39664100  | 3.48913100  | -0.06541600 |
| N | -0.06697000 | 1.79532500  | 0.35430800  |
| C | -0.48525800 | 0.44073600  | 0.20024700  |
| N | -1.53186000 | 0.12574900  | 1.22966500  |
| C | 0.70253100  | -0.49925900 | 0.39144000  |
| C | 1.87017900  | -0.08251500 | -0.48241700 |
| H | -2.25418300 | -0.82106000 | 0.88193400  |
| H | 1.70924800  | -0.35357500 | -1.53018300 |
| H | -1.10769700 | 0.03396900  | 2.15025600  |
| H | 3.05487900  | 1.65648800  | -0.56927200 |
| H | 0.41058500  | -1.52602000 | 0.16003900  |
| S | 3.41266000  | -1.02142600 | 0.00132700  |
| O | 4.47713900  | -0.22303000 | -0.66069000 |
| O | 3.17173400  | -2.36435000 | -0.57698600 |
| O | 3.43564200  | -0.97809600 | 1.48442900  |
| H | 1.03382600  | -0.46711700 | 1.43401100  |
| H | -0.78085800 | 2.50628500  | 0.26168800  |
| O | -1.11688000 | 0.28453600  | -1.06897500 |
| H | -1.26559800 | -0.65882300 | -1.22858300 |
| S | -4.43675700 | -0.74142600 | 0.01949700  |
| O | -4.12912500 | -0.32723900 | -1.59892900 |
| O | -3.14968300 | -1.56986600 | 0.39831100  |
| O | -4.35249500 | 0.56478200  | 0.76033200  |
| H | -3.38429400 | 0.29979900  | -1.61677400 |
| H | -2.25211200 | 0.85729000  | 1.26725600  |

#### C-IM4

|   |             |             |             |
|---|-------------|-------------|-------------|
| N | 2.03423500  | 1.35982700  | -0.34178600 |
| C | 1.04099400  | 2.22905900  | -0.05044700 |
| O | 1.14232600  | 3.44656500  | -0.07679100 |
| N | -0.19000400 | 1.64716700  | 0.33785100  |
| C | -0.49745500 | 0.26029200  | 0.22152800  |
| N | -1.41278500 | -0.07665600 | 1.42587500  |
| C | 0.76405700  | -0.59024300 | 0.36733700  |
| C | 1.88670900  | -0.07345800 | -0.51061600 |
| H | -1.55176500 | -1.08976600 | 1.47628700  |
| H | 1.73492100  | -0.33710500 | -1.56115500 |
| H | -0.97651800 | 0.26534200  | 2.28040600  |
| H | 2.94238200  | 1.74809300  | -0.56756700 |
| H | 0.53449800  | -1.62426100 | 0.10296600  |
| S | 3.49998000  | -0.89717400 | -0.04220900 |
| O | 4.49846900  | -0.00553200 | -0.68770600 |
| O | 3.37024100  | -2.24656600 | -0.63849400 |
| O | 3.51688200  | -0.87372900 | 1.44248900  |
| H | 1.11952300  | -0.56409100 | 1.40291700  |
| H | -0.96242900 | 2.28084200  | 0.17421000  |
| O | -1.23887500 | 0.01502300  | -0.93252800 |
| H | -1.79419300 | -0.79704200 | -0.81952800 |
| S | -4.39267000 | -0.71434900 | 0.02831000  |
| O | -4.50328000 | 0.11867000  | -1.45233600 |

|   |             |             |             |
|---|-------------|-------------|-------------|
| O | -3.19679200 | -1.64711700 | -0.16842200 |
| O | -3.94741600 | 0.38777000  | 1.00497700  |
| H | -3.65816400 | 0.57189000  | -1.61294300 |
| H | -2.42359400 | 0.30352600  | 1.29688600  |

C-IM5

|   |             |             |             |
|---|-------------|-------------|-------------|
| N | -1.82333300 | 1.73693400  | 0.27005300  |
| C | -0.50183500 | 2.00453000  | -0.01726600 |
| O | -0.15426000 | 3.01480100  | -0.61042000 |
| N | 0.42159400  | 1.08992400  | 0.45551500  |
| C | 0.14860800  | -0.16856100 | 1.08582000  |
| N | 0.28610100  | -1.27806900 | 0.02340200  |
| C | -1.26303800 | -0.18324700 | 1.67368000  |
| C | -2.31691500 | 0.48896700  | 0.79638100  |
| H | 0.15200200  | -2.18151300 | 0.47684900  |
| H | -3.20684400 | 0.67914900  | 1.40055200  |
| H | -0.46886900 | -1.16341900 | -0.71766600 |
| H | -2.47075500 | 2.28802100  | -0.27602600 |
| H | -1.18554500 | 0.36407400  | 2.61551300  |
| S | -3.00507200 | -0.61499400 | -0.54870300 |
| O | -4.09111500 | 0.18920400  | -1.14236400 |
| O | -3.40928300 | -1.84556000 | 0.17234500  |
| O | -1.84865500 | -0.83967300 | -1.49329900 |
| H | -1.57241000 | -1.20368200 | 1.90186100  |
| H | 1.40147300  | 1.32424900  | 0.32522700  |
| O | 1.05395900  | -0.46263300 | 2.09205200  |
| H | 1.96076800  | -0.22117400 | 1.76895400  |
| S | 3.95502400  | -0.57512100 | -0.20503000 |
| O | 4.40456800  | 0.51277900  | -1.44398400 |
| O | 3.26263300  | 0.33560200  | 0.81268500  |
| O | 2.87511400  | -1.42966200 | -0.85501400 |
| H | 3.59827900  | 0.93991700  | -1.77589700 |
| H | 1.25753700  | -1.27430900 | -0.39014600 |

C-TS5

|   |             |             |             |
|---|-------------|-------------|-------------|
| N | -2.22812700 | 1.57320700  | 0.42907000  |
| C | -1.17302100 | 2.19531400  | -0.20004200 |
| O | -1.29626600 | 3.26223800  | -0.78677700 |
| N | 0.05694000  | 1.57457300  | -0.08278300 |
| C | 0.37699400  | 0.32417400  | 0.56910800  |
| N | 0.46593700  | -0.76206200 | -0.57712500 |
| C | -0.78065100 | -0.07735100 | 1.50083700  |
| C | -2.18150500 | 0.24111900  | 0.97975300  |
| H | 0.63819700  | -1.67677400 | -0.15853100 |
| H | -2.89218200 | 0.17082000  | 1.80631900  |
| H | -0.45106300 | -0.81573200 | -1.10974200 |
| H | -3.13075900 | 1.91136400  | 0.12624000  |
| H | -0.60822000 | 0.49536900  | 2.41500200  |
| S | -2.87240000 | -1.01991900 | -0.21873500 |
| O | -4.27342000 | -0.59308700 | -0.40885900 |
| O | -2.66290800 | -2.32088300 | 0.46117900  |
| O | -2.03509200 | -0.86808700 | -1.46675800 |
| H | -0.71367800 | -1.13620500 | 1.75310500  |
| H | 0.83417800  | 2.11521900  | -0.43338800 |
| O | 1.57063000  | 0.37831400  | 1.18145700  |
| H | 2.41517800  | -0.65753500 | 1.10991100  |
| S | 4.07577700  | -0.57785700 | -0.33428400 |
| O | 4.07861500  | 0.98993100  | 0.24675300  |
| O | 3.28093400  | -1.30572400 | 0.85799200  |
| O | 3.17269000  | -0.57393600 | -1.53157500 |
| H | 3.17189300  | 1.16240500  | 0.60069700  |
| H | 1.28680200  | -0.55418400 | -1.17068400 |

C-P

|   |             |             |             |
|---|-------------|-------------|-------------|
| N | 2.20718400  | 1.36426500  | -0.10380600 |
| C | 1.29755800  | 2.34102400  | 0.04667900  |
| O | 1.46909300  | 3.41596700  | 0.59518900  |
| N | 0.02642500  | 2.05575300  | -0.53230700 |
| C | -0.43289800 | 0.83356700  | -0.89481700 |
| N | -0.38453300 | 0.06151200  | 2.21445000  |
| C | 0.55903400  | -0.29302000 | -0.92524600 |
| C | 2.02374100  | 0.12626000  | -0.84158400 |
| H | 0.42155100  | -0.56316300 | 2.18505400  |
| H | 2.47472800  | 0.20761400  | -1.83501300 |
| H | -1.23616000 | -0.49164300 | 2.14660900  |
| H | 3.11771400  | 1.49463700  | 0.32320600  |
| H | 0.38083200  | -0.88965300 | -1.82039900 |
| S | 3.03590500  | -1.19434100 | 0.01641500  |
| O | 4.29823600  | -0.46782000 | 0.31602700  |
| O | 3.13905100  | -2.26037600 | -1.00395500 |
| O | 2.23738500  | -1.55669200 | 1.21752700  |
| H | 0.31451000  | -0.92146800 | -0.06310200 |
| H | -0.65968600 | 2.78305300  | -0.37766300 |
| O | -1.62762000 | 0.66788900  | -1.18243300 |
| H | -0.38653500 | 0.51773200  | 3.12085500  |
| H | -3.27619700 | 1.11609100  | -0.39761300 |
| S | -4.26025000 | -0.76222200 | 0.17497000  |
| O | -3.49942600 | -1.32798000 | -1.18049400 |
| O | -3.38973900 | -1.03065300 | 1.33609500  |
| O | -4.19438000 | 0.86901600  | -0.14699700 |
| H | -2.65017400 | -0.84068300 | -1.31032000 |

Path D

D-RC

|   |             |             |             |
|---|-------------|-------------|-------------|
| N | 1.84626200  | 1.36355100  | -0.25951500 |
| C | 1.25890700  | 2.55811600  | -0.07783700 |
| O | 1.69581400  | 3.65678900  | -0.36366000 |
| N | -0.05389300 | 2.47050500  | 0.51287000  |
| C | -0.60867600 | 1.35548400  | 1.02124500  |
| N | -1.87073100 | 1.31227100  | 1.36203900  |
| C | 0.28815700  | 0.16937300  | 1.16174800  |
| C | 1.12317700  | 0.10416700  | -0.10923400 |
| H | -2.46766800 | 2.06001700  | 1.02059300  |
| H | 0.48347400  | -0.08427800 | -0.97607600 |
| H | -0.54392100 | -2.49053200 | -0.30967800 |
| H | 2.73476200  | 1.32491500  | -0.74825300 |
| H | -0.29689800 | -0.73867600 | 1.29959600  |
| S | 2.32389700  | -1.31103000 | -0.10008200 |
| O | 3.32765500  | -0.87072800 | -1.10296900 |
| O | 1.46430200  | -2.44588600 | -0.53073700 |
| O | 2.82773900  | -1.40059700 | 1.28750200  |
| H | 0.95366400  | 0.30062600  | 2.02204400  |
| H | -0.63743900 | 3.27189300  | 0.30759600  |
| O | -2.63135100 | 2.15174200  | -1.24130900 |
| H | -2.35705100 | 0.36504100  | 1.38714900  |
| S | -2.66494400 | -1.58966200 | -0.38255800 |
| O | -2.02405000 | -0.51111900 | -1.25763300 |
| O | -1.32210000 | -2.42066600 | 0.28265000  |
| O | -3.18116300 | -0.94960100 | 0.90381200  |
| H | -2.45256000 | 1.17951800  | -1.30769500 |
| H | -3.03523000 | 2.39594000  | -2.07757600 |

D-TS1

|   |             |             |             |
|---|-------------|-------------|-------------|
| N | -2.34127500 | -0.30397700 | -0.45355300 |
| C | -2.56499400 | -1.62645500 | -0.26311700 |
| O | -3.60386600 | -2.21501900 | -0.52032500 |
| N | -1.47589900 | -2.35634800 | 0.27979900  |

|   |             |             |             |
|---|-------------|-------------|-------------|
| C | -0.24146400 | -1.82288800 | 0.56487900  |
| N | 0.62883600  | -2.53754500 | 1.32604700  |
| C | -0.28475400 | -0.34423700 | 0.81915800  |
| C | -1.05680900 | 0.35743200  | -0.27148500 |
| H | 0.71820000  | -3.51506100 | 1.08045800  |
| H | -0.49527000 | 0.38396000  | -1.20798800 |
| H | 1.87679900  | 1.82940800  | -0.05742200 |
| H | -3.09397600 | 0.23233400  | -0.86614300 |
| H | 0.72238600  | 0.04074000  | 0.92911600  |
| S | -1.23823100 | 2.15298900  | 0.13197500  |
| O | -2.16874000 | 2.63805800  | -0.91460600 |
| O | 0.17853300  | 2.60357600  | -0.02632900 |
| O | -1.75192700 | 2.22667100  | 1.51574200  |
| H | -0.80375600 | -0.19631900 | 1.77264800  |
| H | -1.61676600 | -3.35597200 | 0.27028500  |
| O | 0.64941800  | -1.92887600 | -1.12422500 |
| H | 1.53490000  | -2.06134300 | 1.39691000  |
| S | 3.36839500  | 0.08349300  | -0.19408200 |
| O | 2.55440200  | -0.46762200 | -1.43252800 |
| O | 2.85196200  | 1.65073800  | -0.06871700 |
| O | 2.86610800  | -0.66012700 | 1.02283800  |
| H | 1.62623800  | -1.17578100 | -1.24649500 |
| H | 0.04798400  | -1.74289300 | -1.85511600 |

D-IM1

|   |             |             |             |
|---|-------------|-------------|-------------|
| N | -2.15320600 | 0.41666700  | -0.72136700 |
| C | -2.96292600 | -0.66309300 | -0.55565800 |
| O | -4.15614500 | -0.67924400 | -0.83188500 |
| N | -2.33024900 | -1.82383400 | -0.07940100 |
| C | -0.97816400 | -1.84794700 | 0.44914500  |
| N | -0.90799000 | -2.78206100 | 1.54475200  |
| C | -0.53929500 | -0.45418800 | 0.88187900  |
| C | -0.78025100 | 0.51717300  | -0.25834700 |
| H | -0.89044800 | -3.73056800 | 1.18000900  |
| H | -0.08006900 | 0.34854100  | -1.08200800 |
| H | 2.28037600  | 1.38848700  | -0.17296300 |
| H | -2.57097800 | 1.24562700  | -1.12446300 |
| H | 0.51613800  | -0.46939300 | 1.15786100  |
| S | -0.42012700 | 2.26326500  | 0.25131600  |
| O | -0.96379700 | 3.06064400  | -0.87191400 |
| O | 1.08181400  | 2.26039700  | 0.33030500  |
| O | -1.06770600 | 2.47901200  | 1.55826900  |
| H | -1.12917600 | -0.14773500 | 1.74842000  |
| H | -2.98276800 | -2.45825300 | 0.35776100  |
| O | -0.09072200 | -2.28513100 | -0.63942300 |
| H | -0.03606000 | -2.64268900 | 2.04617300  |
| S | 3.40523500  | -0.59996100 | -0.22870300 |
| O | 2.45446800  | -1.32256600 | -1.40109300 |
| O | 3.14836700  | 0.96427000  | -0.50421500 |
| O | 2.78123800  | -0.98622500 | 1.06601900  |
| H | 1.58824400  | -1.60728000 | -1.02753400 |
| H | -0.65320200 | -2.45592700 | -1.40358200 |

D-TS2

|   |             |             |             |
|---|-------------|-------------|-------------|
| N | -2.15234800 | 0.44977900  | -0.72116200 |
| C | -2.96948500 | -0.63006200 | -0.58620400 |
| O | -4.15656300 | -0.63602000 | -0.88945100 |
| N | -2.35081300 | -1.79208000 | -0.10615800 |
| C | -1.01195300 | -1.84784800 | 0.45731600  |
| N | -0.98916600 | -2.79944100 | 1.55323300  |
| C | -0.55501300 | -0.45541500 | 0.88041000  |
| C | -0.77924100 | 0.52257600  | -0.25812900 |
| H | -0.48892700 | -3.63009400 | 1.25768300  |
| H | -0.07893000 | 0.34470200  | -1.08061000 |
| H | 2.28710000  | 1.37304400  | -0.20659700 |

|   |             |             |             |
|---|-------------|-------------|-------------|
| H | -2.55451900 | 1.28482500  | -1.12697300 |
| H | 0.49940300  | -0.48774200 | 1.15974500  |
| S | -0.39333300 | 2.26140100  | 0.26171500  |
| O | -0.93378800 | 3.07443800  | -0.85135500 |
| O | 1.10865300  | 2.24258800  | 0.33363300  |
| O | -1.03133000 | 2.47186000  | 1.57454200  |
| H | -1.14250600 | -0.13207300 | 1.74432500  |
| H | -3.00284700 | -2.46351100 | 0.27184700  |
| O | -0.11370000 | -2.33817000 | -0.58551800 |
| H | -0.49604000 | -2.41263900 | 2.34981100  |
| S | 3.41051500  | -0.61328400 | -0.24460500 |
| O | 2.44100800  | -1.37525000 | -1.37998300 |
| O | 3.14108000  | 0.94041200  | -0.56383900 |
| O | 2.80909500  | -0.96207200 | 1.07008600  |
| H | 1.58480600  | -1.65116000 | -0.98089700 |
| H | -0.65765200 | -2.48082600 | -1.36875300 |

D-IM2

|   |             |             |             |
|---|-------------|-------------|-------------|
| N | -2.18556300 | 0.46171800  | -0.65392500 |
| C | -2.95159700 | -0.66317300 | -0.59417000 |
| O | -4.07144500 | -0.75411200 | -1.08463000 |
| N | -2.39433300 | -1.73657900 | 0.10704600  |
| C | -1.00821400 | -1.82146800 | 0.48396300  |
| N | -0.89547700 | -2.86073700 | 1.49692300  |
| C | -0.53023400 | -0.42924900 | 0.88961300  |
| C | -0.79776500 | 0.54881700  | -0.24028600 |
| H | 0.06315500  | -2.88899000 | 1.83450400  |
| H | -0.12897400 | 0.37234000  | -1.08897800 |
| H | 2.27706500  | 1.36153700  | -0.18328000 |
| H | -2.56238200 | 1.23426400  | -1.18653900 |
| H | 0.53075300  | -0.46486300 | 1.13743300  |
| S | -0.39460900 | 2.28477600  | 0.26262200  |
| O | -0.91954300 | 3.09794300  | -0.85748800 |
| O | 1.10913400  | 2.24288600  | 0.33515300  |
| O | -1.02475500 | 2.51903000  | 1.57550500  |
| H | -1.08792900 | -0.10914300 | 1.77272600  |
| H | -2.89591100 | -2.60389000 | -0.02286600 |
| O | -0.15928000 | -2.23359700 | -0.61253500 |
| H | -1.50022500 | -2.64194300 | 2.28271900  |
| S | 3.39041500  | -0.63894100 | -0.26613400 |
| O | 2.42254500  | -1.35456300 | -1.43095700 |
| O | 3.13819700  | 0.92628700  | -0.52726800 |
| O | 2.78237900  | -1.03151800 | 1.03477500  |
| H | 1.53935900  | -1.58175600 | -1.06291500 |
| H | -0.33120000 | -3.17016400 | -0.77208000 |

D-TS3

|   |             |             |             |
|---|-------------|-------------|-------------|
| N | -2.44603300 | -0.16929100 | -0.33149300 |
| C | -2.67907300 | -1.51290100 | -0.26179100 |
| O | -3.74974700 | -2.03240300 | -0.54627600 |
| N | -1.60714100 | -2.31557400 | 0.19433000  |
| C | -0.24952300 | -1.81447600 | 0.24287700  |
| N | 0.60454700  | -2.69124900 | 1.17643700  |
| C | -0.29273500 | -0.37141000 | 0.70127400  |
| C | -1.11302900 | 0.40593700  | -0.29811400 |
| H | 1.35220900  | -2.11664800 | 1.58156400  |
| H | -0.64752900 | 0.39245300  | -1.28903200 |
| H | 1.81672200  | 1.80099700  | -0.08134000 |
| H | -3.19137300 | 0.38309300  | -0.73335400 |
| H | 0.71335200  | 0.01752700  | 0.79052200  |
| S | -1.10004500 | 2.19688300  | 0.14787500  |
| O | -2.05244500 | 2.81758900  | -0.79782500 |
| O | 0.34115300  | 2.53025400  | -0.13222800 |
| O | -1.46302700 | 2.29151300  | 1.57640600  |

|        |             |             |             |
|--------|-------------|-------------|-------------|
| H      | -0.77187800 | -0.29977800 | 1.68097800  |
| H      | -1.69643900 | -3.24433000 | -0.20076800 |
| O      | 0.51253500  | -2.10884400 | -0.88711600 |
| H      | 0.11976900  | -3.25826900 | 1.86886600  |
| S      | 3.33440900  | 0.04753000  | -0.20496600 |
| O      | 2.50699700  | -0.52716000 | -1.49100400 |
| O      | 2.80363200  | 1.57311800  | -0.09346300 |
| O      | 2.85361200  | -0.73432500 | 0.98561600  |
| H      | 1.70069100  | -1.10370200 | -1.24379800 |
| H      | 0.97951500  | -2.97000200 | 0.04655800  |
| D-P    |             |             |             |
| N      | 2.54739200  | 0.17705600  | -0.25497100 |
| C      | 2.94750100  | 1.45019100  | -0.00580200 |
| O      | 4.08787300  | 1.87076000  | -0.09534500 |
| N      | 1.89411500  | 2.32832800  | 0.36627800  |
| C      | 0.58307700  | 1.98331300  | 0.62418300  |
| N      | -1.36558200 | -1.71948800 | 3.04294500  |
| C      | 0.36402600  | 0.49874600  | 0.73090700  |
| C      | 1.14066400  | -0.16881700 | -0.39095700 |
| H      | -2.01303700 | -1.27400600 | 2.39573800  |
| H      | 0.75741600  | 0.14037800  | -1.36979000 |
| H      | -1.50965800 | -0.86154300 | -1.30284500 |
| H      | 3.22917400  | -0.45173300 | -0.66088700 |
| H      | -0.69736400 | 0.27597400  | 0.69533900  |
| S      | 0.89444500  | -2.00080700 | -0.40561400 |
| O      | 1.96303400  | -2.48671100 | -1.30415800 |
| O      | -0.49075300 | -2.09915400 | -0.97892100 |
| O      | 0.98395600  | -2.45759400 | 0.99665500  |
| H      | 0.74390000  | 0.14385500  | 1.69494000  |
| H      | 2.13700200  | 3.30997500  | 0.36820900  |
| O      | -0.29264700 | 2.83013100  | 0.73972700  |
| H      | -0.61864200 | -2.11877100 | 2.47407700  |
| S      | -3.22338600 | 0.50340200  | -0.69976000 |
| O      | -2.79299500 | 2.09670900  | -0.59860400 |
| O      | -1.97714200 | -0.02637300 | -1.63091300 |
| O      | -3.06373300 | -0.10899200 | 0.64035300  |
| H      | -1.98663000 | 2.25945000  | -0.05520000 |
| H      | -1.86293700 | -2.49718500 | 3.46629300  |
| Path E |             |             |             |
| E-RC   |             |             |             |
| N      | -1.86085400 | 1.21007000  | -0.21360300 |
| C      | -0.52256800 | 1.42277800  | -0.41672800 |
| O      | -0.06887300 | 2.50513200  | -0.76030500 |
| N      | 0.30386300  | 0.31353000  | -0.20686400 |
| C      | -0.13239900 | -0.97120500 | 0.03031600  |
| N      | 0.72228600  | -1.90916000 | 0.24350600  |
| C      | -1.63238700 | -1.18060000 | -0.03839700 |
| C      | -2.39136000 | 0.04037300  | 0.45041200  |
| H      | 2.67044500  | -1.91205300 | 0.34988100  |
| H      | -2.33565500 | 0.13052300  | 1.54256800  |
| H      | 0.23915600  | -2.79103300 | 0.39775100  |
| H      | -2.45608200 | 2.02634600  | -0.25210200 |
| H      | -1.91156800 | -2.05981900 | 0.54312700  |
| S      | -4.22109900 | -0.09471200 | 0.12171000  |
| O      | -4.69268600 | 1.30657300  | 0.31262800  |
| O      | -4.68232700 | -1.04875500 | 1.16552900  |
| O      | -4.35623200 | -0.60055600 | -1.26853500 |
| H      | -1.91632800 | -1.35781100 | -1.08181900 |
| H      | 1.32899600  | 0.47352800  | -0.25345300 |
| O      | 5.19528200  | 2.06352900  | 1.37940600  |
| H      | 4.28824800  | 1.95265900  | 1.05309700  |
| H      | 5.58679800  | 1.25705700  | 0.99276400  |



|   |            |             |             |
|---|------------|-------------|-------------|
| S | 4.12781200 | -0.58603800 | -0.66428400 |
| O | 5.52476500 | -0.32350300 | -0.15366900 |
| O | 3.65431400 | -1.91583100 | 0.34402000  |
| O | 3.16498100 | 0.51384300  | -0.20976300 |

E-TS1

|   |             |             |             |
|---|-------------|-------------|-------------|
| N | -1.46969100 | 1.28948900  | 0.22387100  |
| C | -0.24397900 | 1.78738200  | -0.10007100 |
| O | 0.02667500  | 2.97974000  | -0.04395400 |
| N | 0.71067600  | 0.85389100  | -0.53744700 |
| C | 0.45658600  | -0.46568600 | -0.67911600 |
| N | 1.32876200  | -1.23647100 | -1.33358900 |
| C | -0.97250500 | -0.93322600 | -0.60444200 |
| C | -1.80444800 | -0.11293700 | 0.36198400  |
| H | 2.35961200  | -1.01341900 | -1.31189200 |
| H | -1.66764800 | -0.46185500 | 1.38879300  |
| H | 1.15721500  | -2.22243200 | -1.19450900 |
| H | -2.15815000 | 1.95565200  | 0.54737400  |
| H | -0.98861200 | -1.98286500 | -0.31880100 |
| S | -3.63642200 | -0.31733900 | 0.06024500  |
| O | -4.21747100 | 0.81896800  | 0.83586800  |
| O | -3.94191300 | -1.66110000 | 0.61776800  |
| O | -3.83506100 | -0.20872900 | -1.40977800 |
| H | -1.40268900 | -0.82830600 | -1.60838300 |
| H | 1.72349900  | 1.14823300  | -0.45943000 |
| O | 1.06147000  | -1.27418500 | 1.33127900  |
| H | 0.69362500  | -0.83316000 | 2.10506800  |
| H | 2.45232600  | -0.97103200 | 1.35915700  |
| S | 4.22407700  | 0.01888900  | 0.17834800  |
| O | 3.52010500  | -0.76289900 | 1.43753400  |
| O | 4.00907700  | -0.91227000 | -1.03821400 |
| O | 3.35539500  | 1.26832700  | -0.06360800 |

E-IM1

|   |             |             |             |
|---|-------------|-------------|-------------|
| N | 1.69556100  | 1.27609700  | -0.27139700 |
| C | 0.49420500  | 1.80661700  | 0.11042000  |
| O | 0.27793800  | 3.02348600  | 0.09307200  |
| N | -0.45236700 | 0.90770300  | 0.54651400  |
| C | -0.34532600 | -0.53586900 | 0.40405700  |
| N | -1.15376000 | -1.13304900 | 1.46311000  |
| C | 1.12727800  | -0.93472000 | 0.55708900  |
| C | 1.99779000  | -0.13593700 | -0.39760300 |
| H | -2.07895500 | -0.69708100 | 1.45929000  |
| H | 1.85984100  | -0.48055000 | -1.42693500 |
| H | -1.28764800 | -2.11115900 | 1.22314200  |
| H | 2.39013000  | 1.92796500  | -0.60646300 |
| H | 1.23368800  | -1.99993800 | 0.34866600  |
| S | 3.82217800  | -0.39822800 | -0.10634200 |
| O | 4.44274000  | 0.69940000  | -0.91074200 |
| O | 4.07432100  | -1.76286100 | -0.64889900 |
| O | 4.05792100  | -0.27589700 | 1.35695400  |
| H | 1.43492300  | -0.73847200 | 1.58456600  |
| H | -1.37835300 | 1.29019200  | 0.69546900  |
| O | -0.74704400 | -0.97637100 | -0.89880400 |
| H | -1.68875000 | -0.74697900 | -1.03975600 |
| H | -5.05411000 | -1.81679600 | -0.06187500 |
| S | -4.44207400 | 0.29460300  | -0.36202300 |
| O | -5.58187000 | -1.01436100 | 0.06651000  |
| O | -3.69850600 | 0.55778700  | 0.92227100  |
| O | -3.54826800 | -0.44180600 | -1.34206500 |

E-TS2

|   |            |            |             |
|---|------------|------------|-------------|
| N | 2.01638400 | 1.27795000 | -0.37402900 |
| C | 0.97648500 | 2.07728100 | -0.01206900 |

|   |             |             |             |
|---|-------------|-------------|-------------|
| O | 0.98743800  | 3.30225500  | -0.17319900 |
| N | -0.10101000 | 1.44631300  | 0.59371900  |
| C | -0.32580400 | -0.00140900 | 0.55567200  |
| N | -1.17445700 | -0.34713200 | 1.70071300  |
| C | 1.04132300  | -0.69266800 | 0.66475500  |
| C | 2.00510800  | -0.17360400 | -0.38742900 |
| H | -1.89017600 | -1.00711600 | 1.40758900  |
| H | 1.74305000  | -0.55372000 | -1.37948000 |
| H | -1.67515000 | 0.47092000  | 2.02813000  |
| H | 2.81048300  | 1.73176800  | -0.80385500 |
| H | 0.89861400  | -1.76658300 | 0.54691900  |
| S | 3.75475900  | -0.77856900 | -0.14956800 |
| O | 4.52951200  | 0.11407100  | -1.06704600 |
| O | 3.70423500  | -2.20021200 | -0.58754000 |
| O | 4.08979400  | -0.59483500 | 1.28717400  |
| H | 1.44528500  | -0.49831100 | 1.65878700  |
| H | -0.93852700 | 2.01277500  | 0.54767000  |
| O | -0.91182300 | -0.41693000 | -0.66815000 |
| H | -1.82672900 | -0.05803400 | -0.71117600 |
| H | -4.51834000 | -1.52117200 | -1.66151100 |
| S | -4.77903600 | -0.01223100 | -0.03620800 |
| O | -5.32714500 | -1.08847300 | -1.34723200 |
| O | -4.42757500 | -0.95639300 | 1.07940300  |
| O | -3.52308100 | 0.58361200  | -0.65204000 |

#### E-IM2

|   |             |             |             |
|---|-------------|-------------|-------------|
| N | 1.86235300  | 1.29397900  | -0.30721800 |
| C | 0.72252100  | 1.94292100  | 0.06807300  |
| O | 0.61309200  | 3.17298600  | 0.01522500  |
| N | -0.29261900 | 1.14516300  | 0.56214000  |
| C | -0.35452800 | -0.32463600 | 0.41591500  |
| N | -1.18149700 | -0.90735400 | 1.46907000  |
| C | 1.07729600  | -0.86063600 | 0.52616100  |
| C | 2.02073800  | -0.14236900 | -0.42345300 |
| H | -2.16787100 | -0.66997300 | 1.33866100  |
| H | 1.85886400  | -0.47467500 | -1.45365300 |
| H | -0.89716800 | -0.52025300 | 2.36400300  |
| H | 2.61518400  | 1.86761800  | -0.66009600 |
| H | 1.05925300  | -1.92580700 | 0.30211200  |
| S | 3.81201200  | -0.57107300 | -0.11620100 |
| O | 4.53595800  | 0.46346000  | -0.91773400 |
| O | 3.94653200  | -1.95430300 | -0.64981100 |
| O | 4.03939200  | -0.46048600 | 1.34990000  |
| H | 1.43089700  | -0.72369300 | 1.55099400  |
| H | -1.18548500 | 1.61889300  | 0.59893800  |
| O | -0.86752700 | -0.69489900 | -0.84276200 |
| H | -1.76822700 | -0.31621100 | -0.94629900 |
| H | -4.52992500 | -1.99301200 | -0.72036200 |
| S | -4.68316700 | 0.17238600  | -0.18966900 |
| O | -5.29036900 | -1.39319400 | -0.77312200 |
| O | -4.27690300 | -0.12242700 | 1.23217400  |
| O | -3.44903400 | 0.37660000  | -1.04743200 |

#### E-TS3

|   |             |             |             |
|---|-------------|-------------|-------------|
| N | 1.76586100  | 1.29597900  | -0.41375900 |
| C | 0.75050500  | 2.12338800  | -0.03647400 |
| O | 0.76860800  | 3.34082500  | -0.26506000 |
| N | -0.28265700 | 1.53358900  | 0.66526600  |
| C | -0.54783100 | 0.06426200  | 0.69906200  |
| N | -1.29718900 | -0.26134100 | 1.92608600  |
| C | 0.83326200  | -0.62001800 | 0.77670100  |
| C | 1.74819700  | -0.15289200 | -0.34150800 |
| H | -2.28569200 | -0.05131300 | 1.79649100  |
| H | 1.44098400  | -0.58970800 | -1.29704300 |

|   |             |             |             |
|---|-------------|-------------|-------------|
| H | -0.94605400 | 0.28972800  | 2.70311800  |
| H | 2.53287800  | 1.71843100  | -0.91727200 |
| H | 0.67857900  | -1.69580600 | 0.70717400  |
| S | 3.50788900  | -0.74840900 | -0.14688600 |
| O | 4.24603200  | 0.08433400  | -1.14853600 |
| O | 3.44497600  | -2.19488400 | -0.49478600 |
| O | 3.90931100  | -0.47990700 | 1.26102500  |
| H | 1.30276900  | -0.39515600 | 1.73842100  |
| H | -1.11159100 | 2.11292400  | 0.67703900  |
| O | -1.26961700 | -0.33130800 | -0.40495100 |
| H | -2.42293300 | 0.43476700  | -0.93356100 |
| H | -2.30220900 | -1.33793400 | -0.34513200 |
| S | -4.34623600 | -0.53017400 | -0.52485800 |
| O | -3.27847600 | -1.75934000 | -0.48794200 |
| O | -4.58989900 | -0.08500400 | 0.88416700  |
| O | -3.41594600 | 0.61345200  | -1.24531100 |

E-IM3

|   |             |             |             |
|---|-------------|-------------|-------------|
| N | 1.45526900  | 1.26825700  | -0.13157600 |
| C | 0.21505500  | 1.58073600  | 0.35369900  |
| O | -0.15574500 | 2.75133500  | 0.50261800  |
| N | -0.57684400 | 0.51204500  | 0.70486600  |
| C | -0.30829100 | -0.88695000 | 0.33197700  |
| N | -0.97772300 | -1.78592100 | 1.27514700  |
| C | 1.20642300  | -1.10673100 | 0.37988000  |
| C | 1.93848900  | -0.06128700 | -0.44557300 |
| H | -1.97427000 | -1.55966000 | 1.26951800  |
| H | 1.83748100  | -0.27590300 | -1.51393900 |
| H | -0.64847900 | -1.55692500 | 2.20984500  |
| H | 2.04933400  | 2.04388100  | -0.38675700 |
| H | 1.42506100  | -2.10283800 | -0.00149800 |
| S | 3.78602100  | -0.11176600 | -0.17534300 |
| O | 4.24605100  | 1.16292900  | -0.80745800 |
| O | 4.22094300  | -1.33821900 | -0.89991800 |
| O | 4.00863900  | -0.16638300 | 1.29519900  |
| H | 1.54681000  | -1.04136800 | 1.41641000  |
| H | -1.54225000 | 0.73141200  | 0.92753000  |
| O | -0.74105500 | -1.16716900 | -0.98036900 |
| H | -3.95769300 | 1.80179600  | -0.61830500 |
| H | -1.70588500 | -1.00804100 | -1.05964800 |
| S | -4.47056100 | -0.32628000 | -0.16623000 |
| O | -3.56124300 | -0.81785100 | -1.27133700 |
| O | -3.66699100 | -0.15845000 | 1.10817600  |
| O | -4.81215500 | 1.34144700  | -0.62653000 |

E-TS4

|   |             |             |             |
|---|-------------|-------------|-------------|
| N | -1.70488600 | 1.32862300  | 0.18468700  |
| C | -0.47098600 | 1.84025000  | -0.12132300 |
| O | -0.26953200 | 3.05433600  | -0.20265400 |
| N | 0.52479000  | 0.91785600  | -0.36238600 |
| C | 0.40647700  | -0.50288100 | -0.11552300 |
| N | 1.34291200  | -1.29803700 | -1.03544500 |
| C | -1.04697800 | -0.93755200 | -0.35313000 |
| C | -1.99165100 | -0.06481700 | 0.45128800  |
| H | 2.18213200  | -0.71935300 | -1.26996200 |
| H | -1.92155900 | -0.29880200 | 1.51905000  |
| H | 0.92692400  | -1.75784500 | -1.84174800 |
| H | -2.43363300 | 1.99763700  | 0.38722300  |
| H | -1.15664200 | -1.97898800 | -0.04930800 |
| S | -3.78133300 | -0.41140700 | 0.04341600  |
| O | -4.48929400 | 0.76517500  | 0.63118000  |
| O | -4.05974900 | -1.69933600 | 0.73602100  |
| O | -3.87225200 | -0.49053800 | -1.43979500 |
| H | -1.30902500 | -0.83583200 | -1.41100100 |
| H | 1.47166500  | 1.28438300  | -0.41520800 |

|     |             |             |             |
|-----|-------------|-------------|-------------|
| O   | 0.98026100  | -0.97470900 | 1.05857600  |
| H   | 2.76993000  | -0.24178400 | 1.41234200  |
| H   | 1.52605500  | -1.74250100 | 0.09114300  |
| S   | 4.54270600  | 0.14525000  | 0.04591900  |
| O   | 5.01021800  | -1.27031300 | -0.17239300 |
| O   | 3.42684200  | 0.48087000  | -0.96469200 |
| O   | 3.67867000  | 0.12233000  | 1.53778700  |
| E-P |             |             |             |
| N   | 2.06787400  | 1.20447700  | 0.24611200  |
| C   | 0.76636300  | 1.59603000  | 0.37481400  |
| O   | 0.43442700  | 2.71794600  | 0.72622400  |
| N   | -0.19101300 | 0.60871000  | 0.07294300  |
| C   | 0.07749400  | -0.71949000 | -0.15174500 |
| N   | -6.17165900 | -1.49193600 | 1.69229300  |
| C   | 1.53337700  | -1.13594200 | -0.03410800 |
| C   | 2.48039100  | -0.01390500 | -0.41905200 |
| H   | -5.42485800 | -2.02116100 | 1.24190600  |
| H   | 2.51736500  | 0.11634900  | -1.50786700 |
| H   | -5.78245400 | -1.20230100 | 2.58735200  |
| H   | 2.77250200  | 1.92085100  | 0.36261400  |
| H   | 1.69085100  | -2.01971900 | -0.65028000 |
| S   | 4.25343500  | -0.38349000 | 0.02764500  |
| O   | 4.89440500  | 0.96097200  | -0.06251100 |
| O   | 4.68050500  | -1.34008500 | -1.02663000 |
| O   | 4.22508100  | -0.95363400 | 1.39835500  |
| H   | 1.72433100  | -1.41173300 | 1.00959100  |
| H   | -1.19076500 | 0.89876000  | 0.06442800  |
| O   | -0.80604000 | -1.53102300 | -0.40092900 |
| H   | -2.81546200 | -1.35184400 | -0.46643000 |
| H   | -6.18075400 | -0.64039900 | 1.12118900  |
| S   | -4.03953900 | 0.47749200  | -0.91104700 |
| O   | -5.41298300 | 0.68163800  | -0.33218700 |
| O   | -2.96014200 | 1.14642100  | -0.07613800 |
| O   | -3.78215800 | -1.23245500 | -0.51705300 |
